# Supplementary material for: Allelic exclusion of the immunoglobulin heavy chain locus is independent of its nuclear localization in mature B cells
Source: PubMed Central journal article supplement (PMC3737562; doi:10.1093/nar/gkt491), 2013-06-07

## Supplementary information to:

### Allelic exclusion of the immunoglobulin heavy chain locus is independent of its nuclear localization in mature B cells

Sjoerd J.B Holwerda<sup>1</sup>, Harmen J.G van de Werken<sup>1#</sup>, Claudia Ribeiro de Almeida<sup>2#</sup>, Ingrid M. Bergen<sup>2</sup>, Marjolein J.W. de Bruijn<sup>2</sup>, Marjon J. Verstegen<sup>1</sup>, Marieke Simonis<sup>1</sup>, Erik Splinter<sup>1#</sup>, Patrick J. Wijchers<sup>1</sup>, Rudi W. Hendriks<sup>2\*</sup>, Wouter de Laat<sup>1\*</sup>

#### Supplementary Materials and Methods

##### Mice

Spleens were harvested from F1 hybrid mice (C57Bl/6 x FVB) at 8 to 14 weeks. Fetal brain was isolated from 14.5 dpc mouse embryos. Single cell suspensions, for fetal brains, were prepared by filtration through a 40µm cell strainer (BD biosciences). Mice were bred and kept at specified pathogen free conditions in the Erasmus MC experimental animal facility. All experimental protocols have been reviewed and approved by the Erasmus MC Committee of animal experiments.

##### Total B and T cell isolation, cell culture and separation of IgM<sup>a</sup> and IgM<sup>b</sup> expressing B cells

Splenic cell suspensions were prepared and sorted using magnetic beads as previously described (51). Erythrocytes were lysed using Gey's solution. B cells were purified using streptavidin-coupled magnetic beads (Miltenyi Biotec), by negative selection using the following biotinylated antibodies: CD5, CD43, CD138, CD11b, Gr-1 and TER-119 (**Suppl. Table 1.1**). Purified (resting) B cells were *in-vitro* activated, as described in Ref. (18) for 4 days using αCD40 coated plates (20ug/ml; BD Biosciences) and IL-4 (IL-4 50 ng/ml; Peprotech). Splenic T cells were isolated by negative selection using antibodies against B220, NK1.1, CD11b, GR-1 and Ter119 (**Suppl. Table 1.2**). Purified T cells were *in-vitro* activated for 4 days using αCD3 (10µg/ml), αCD28 (10µg/ml) and IL-2 (20µg/ml; R&D systems).

Separation of B cell populations based on IgM allotype expression was done by FACS sorting of MACS-purified fractions of resting B cells (as described above) using antibodies to B220 and CD19, in conjunction with allotype-specific antibodies for IgM<sup>a</sup> [FVB] and IgM<sup>b</sup> [C57BL/6], as detailed in **Suppl. Table 1.3**.

##### Mapping 4C single-end and paired-end sequencing data.

The single-end data was mapped, allowing no mismatches, to a database of 4C-seq fragments-ends generated from the mm9/NCBI m37 version of the mouse genome (29). The paired-end sequencing data, however, was first split based on the SNPs (C57Bl/6 vs FVB) detected in the second read (PE2) of the

read-pair and subsequently the first read of the pair (PE1) was mapped as single-end data. If the first read of a pair was at the site of the second restriction enzyme, fragment-ends were used that contain both restriction sites, so called non-blind fragment-ends (26). No mismatches were allowed in the reads.

#### **4C-seq analysis.**

*4C domainograms were generated as described previously (29,52).*

*Correlation plots were generated according to the following scheme:*

Reads corresponding to *trans* fragment-ends are presumed to reflect single ligation events and are therefore first binarized (29), after which a running window statistic (window size of 500 fragment-ends) was calculated (4C profile). We subsequently, calculated the pairwise Spearman's rank correlation coefficient of the 4C profiles. For the *cis* data, we used a window size of 21 fragment-ends and a z-score was calculated with a running background window of 3001 fragment-ends (25). All the z-scores within 2 Mb of the viewpoint were removed before the pairwise Spearman's rank correlation ( $r_s$ ) coefficients were calculated. The correlation matrices were clustered based on Euclidean distance of  $1-r_s$  using a hierarchical clustering algorithm with complete linkage. All computations and plotting of the resulting heat maps were carried out with R (53).

*Interacting domains were determined according to the following scheme:*

To determine which domains are interacting with the viewpoint of interest, we applied a False Discovery Rate (FDR) control (29). In brief, the FDR was calculated after the data was binarized and a binomial one-tailed test was applied on a running window of 100 fragment-ends in *cis* and a background window of 3001. In *trans*, however, the binarized data was transformed with a running window of 500 fragment-ends and a background window based on the number of unique fragment-ends in each chromosome. We permuted ( $N \geq 100$ ) the dataset of each chromosome and calculated the FDR based on the *p*-value statistic of the binomial test. Consecutive fragment-ends with a *q*-value  $< 0.01$  and having a maximum gap size of 25 (*cis*) and 250 (*trans*) fragment-ends were assigned as a single interacting domain.

#### **RNA extraction, labeling and microarray hybridization.**

Expression analysis was done in B and T cells on Affymetrix microarrays (mouse gene st1.0 arrays). RNA was isolated using Trizol® according to manufacturer's instructions. RNA was labeled according to Affymetrix protocol instructions and hybridized to three independent microarrays per cell type per timepoint according to Affymetrix protocol. Expression data for fetal brain was used from (24).

#### **RNA expression analysis.**

Normalized gene expression values were calculated using robust multi-array average (RMA) (54). The

limma package (55) from BioConductor (56) was used for the analysis of differential gene expression in T- and B-cells. Holm's method was used to adjust p-values for multiple testing. Probe sets with an adjusted p-value  $< 0.05$  were selected and their relative expression was plotted in a heat map. The probe sets, as well as, the experiments were clustered after the pairwise Pearson's correlation coefficient ( $r$ ) matrix and the dissimilarity matrix ( $1-r$ ) were calculated. The dissimilarity matrices were used to calculate the Euclidean distances and, subsequently, used for hierarchical clustering with complete linkage. To all 9 clusters, names were assigned based on the expression pattern across the 4 cell types. A Gene Ontology (GO) enrichment analysis was carried out on Entrez genes corresponding to the differentially expressed probe sets. The complete differential expressed gene set and the gene set for each cluster were analyzed with the GO-stats package (57) using a hyper geometrical test for over-representation of genes and a  $p$ -value threshold-value of 0.001.

Genes that have probe sets on the both Affymetrix gene expression arrays were used to compare the properties of 4C-seq domains. For each gene the median value of the corresponding probe set was assigned, after the gene expression dataset was normalized by subtracting its median value. The gene expression distribution showed a clear bimodal distribution for each RNA-expression experiment. Therefore, the median value of the gene expression dataset was used to discriminate between active or transcribed genes and non-active genes.

### **RNA-FISH and DNA-FISH**

Cells were spotted on poly-L-lysine coated coverslips. RNA FISH experiments were performed as described (27). Nuclei with double CD45 signals were, exclusively used to count IgH RNA signals. DNA FISH experiments were performed as described (27) with minor changes. Denaturing of the DNA in the cells on slides was done for 10' @ 80°C in 50% formamide/2X SSC followed by two washes with 2xSSC at 4°C, after which a denatured probe was applied to the slide for overnight hybridization at 42°C followed by post hybridization washes and microscopic analysis. The following BAC clones were used as probes: For the constant region of the IgH locus, RP23-109B20; for the variable region of the IgH locus, RP24-376H17 (kindly provided by M. Busslinger); for *CD45*, RP24-371I24; for  $\gamma$ -satellites a pBleuscript plasmid containing 8 copies of repetitive  $\gamma$ -satellite sequence was used as described (18,58) (kindly provided by J.A. Skok). For the verification of the 4C data the following BAC clones were used. For two interactions in B cells RP23-215D11 and RP23-432F6 were used. For interactions in fetal brain, RP23-69J9 was used. Generation of the probes was done as described (25). Specificity of the probes was verified on metaphase spreads of mouse ES cells (data not shown). 3D distance measurements were done for at least 50 nuclei per data point, using Image J software. The active allele is defined as the least

contracted allele. The other allele is defined as the inactive allele. Distances towards peri-centromeric heterochromatin are measured as the minimal distance of the IgH locus towards the edge of the  $\gamma$ -satellite signal.



## Supplemental references

18. Skok, J.A., Brown, K.E., Azuara, V., Caparros, M.L., Baxter, J., Takacs, K., Dillon, N., Gray, D., Perry, R.P., Merckenschlager, M. *et al.* (2001) Nonequivalent nuclear location of immunoglobulin alleles in B lymphocytes. *Nature immunology*, **2**, 848-854.
24. Simonis, M., Klous, P., Splinter, E., Moshkin, Y., Willemsen, R., de Wit, E., van Steensel, B. and de Laat, W. (2006) Nuclear organization of active and inactive chromatin domains uncovered by chromosome conformation capture-on-chip (4C). *Nature genetics*, **38**, 1348-1354.
25. Splinter, E., de Wit, E., Nora, E.P., Klous, P., van de Werken, H.J., Zhu, Y., Kaaij, L.J., van Ijcken, W., Gribnau, J., Heard, E. *et al.* (2011) The inactive X chromosome adopts a unique three-dimensional conformation that is dependent on Xist RNA. *Genes & development*, **25**, 1371-1383.
26. van de Werken, H.J., Landan, G., Holwerda, S.J., Hoichman, M., Klous, P., Chachik, R., Splinter, E., Valdes-Quezada, C., Oz, Y., Bouwman, B.A. *et al.* (2012) Robust 4C-seq data analysis to screen for regulatory DNA interactions. *Nature methods*, **9**, 969-972.
27. Chaumeil, J., Le Baccon, P., Wutz, A. and Heard, E. (2006) A novel role for Xist RNA in the formation of a repressive nuclear compartment into which genes are recruited when silenced. *Genes & development*, **20**, 2223-2237.
29. van de Werken, H.J., de Vree, P.J., Splinter, E., Holwerda, S.J., Klous, P., de Wit, E. and de Laat, W. (2012) 4C technology: protocols and data analysis. *Methods in enzymology*, **513**, 89-112.
51. Kil, L.P., de Bruijn, M.J., van Nimwegen, M., Corneth, O.B., van Hamburg, J.P., Dingjan, G.M., Thaiss, F., Rimmelzwaan, G.F., Elewaut, D., Delsing, D. *et al.* (2012) Btk levels set the threshold for B-cell activation and negative selection of autoreactive B cells in mice. *Blood*, **119**, 3744-3756.
52. de Wit, E., Braunschweig, U., Greil, F., Bussemaker, H.J. and van Steensel, B. (2008) Global chromatin domain organization of the Drosophila genome. *PLoS genetics*, **4**, e1000045.
53. R Development Core Team. (2010). R: A language and environment for statistical computing. Vienna, Austria: R Foundation for Statistical Computing.
54. Irizarry, R.A., Bolstad, B.M., Collin, F., Cope, L.M., Hobbs, B. and Speed, T.P. (2003) Summaries of Affymetrix GeneChip probe level data. *Nucleic acids research*, **31**, e15.
55. Smyth, G.K., Michaud, J. and Scott, H.S. (2005) Use of within-array replicate spots for assessing differential expression in microarray experiments. *Bioinformatics*, **21**, 2067-2075.
56. Gentleman, R.C., Carey, V.J., Bates, D.M., Bolstad, B., Dettling, M., Dudoit, S., Ellis, B., Gautier, L., Ge, Y., Gentry, J. *et al.* (2004) Bioconductor: open software development for computational biology and bioinformatics. *Genome biology*, **5**, R80.
57. Falcon, S. and Gentleman, R. (2007) Using GOstats to test gene lists for GO term association. *Bioinformatics*, **23**, 257-258.
58. Brown, K.E., Guest, S.S., Smale, S.T., Hahm, K., Merckenschlager, M. and Fisher, A.G. (1997) Association of transcriptionally silent genes with Ikaros complexes at centromeric heterochromatin. *Cell*, **91**, 845-854.

## **Legends to supplemental figures**

**Supplementary table 1.** Antibodies used in the MACS on T (S1.1) and B cells (S1.2) and the subsequent FACS where B cells were separated based on the haplotypic origin of their B cell receptor (S1.3).

**Supplementary table 2.** Gene expression changes between (D4 / D0) confirm *in-vitro* activation of resting, splenic B cells. Absolute fold change is calculated as the average expression, of three independent microarray experiments per cell type, of the activated B cells over the resting B cells.

**Supplementary table 3-11.** Representation of the gene ontology analysis that was done on the 9 clusters as identified in the gene expression analysis of the resting and activated B and T cells (see supplemental figure 10). Supplementary table 3-11 depict the list of biological processes that were found in the GO analysis for gene clusters 1-9, respectively. The lists of genes are sorted based on the P-values, from small to large.

**Supplementary table 12.** Sequence of the 4C primers that were used in the single end 4Cseq experiment (S12a) and the paired-end 4Cseq experiment (S12b).

**Supplementary table 13.** Genomic positions of the SNPs that are used to assign a 4C capture to the C57Bl/6 or the FVB allele in the paired-end 4Cseq strategy.

### **Supplemental figure 1. Lack of RNA signal after RNase treatment.**

Representative RNA FISH picture for RNase treated resting B cells.

### **Supplemental figure 2. Single end allele specific 4C strategy.**

Schematic representation of a 4C HindIII/DpnII fragment of a C57Bl/6 and a FVB allele. A SNP between the two alleles creates an additional DpnII restriction site (*red scissor pair*) in the FVB allele which prohibits the formation of a 4C PCR product using the inverse PCR primer 1 and 2.

### **Supplemental figure 3. Quality control of the 4C experiments.**

Cumulative read distribution of all experiments plotted as the percentage of captured reads in different binned regions. Distance of the regions are relative to the viewpoints.

### **Supplemental figure 4. Local contact profiles at the FVB allele.**

(A,B) Contact profiles of the *IgH* locus in resting (A) and activated (B) B cells, from left to right looking from: 3'RR (i), *Cy3* (ii) and *d-V<sub>H</sub>* (iii). (C,D) Zoom-in at 3'border (dotted black line) of *IgH* locus in resting (C) and activated (D) B cells, from left to right looking from: 3'RR (i), *Cy3* (ii) and *d-V<sub>H</sub>* (iii). The black line above the tracks indicates the region where the productive allele in B cells has only few interactions compared to the other alleles. (E) Zoom-in at 5'border (dotted black line) of *IgH* locus in resting (i) and activated (ii) B cells, looking from 4C viewpoint *d-V<sub>H</sub>*.

#### **Supplemental figure 5. Topological and recombination borders defined by HiC and 4C.**

Contacts around the *IgH* locus are shown from top to bottom as Hi-C data in ESCs (i), *RAG1*<sup>-/-</sup> pro B cells (ii) and a G1 arrested pre-B cell line (iii). 4C data (iv) for the *IgH* locus looking from the *d-V<sub>H</sub>* 4C viewpoint in resting B cells. Top to bottom: the productive (red) and non-productive B cell allele (blue), T cells (blue) and fetal brain (black). The black bar depicts the region that is recombined in the preB cell line (iii) and on the productive allele (iv). The shaded region depicts the topological domain spanning the *IgH* locus.

#### **Supplemental figure 6. Difference in 4C contacts at the proximal V region.**

Raw 4C contact data looking from the *d-V<sub>H</sub>* 4C viewpoint in resting (i) and activated (ii) B cells. Contacts for the productive and the non-productive B cell alleles are shown in red and grey, respectively. Purple colored 4C signals depict saturation of the signal given the maximum value of the Y-axis.

#### **Supplemental figure 7. Cis contacts of the IgH locus at the FVB allele.**

(A-F) Domainograms showing chromosome-wide interactions of the FVB allele, in resting (A) or activated B cells (B) looking from the 3'RR 4C viewpoint; in resting (C) or activated B cells (D) looking from the *Cy3* viewpoint; in resting (E) or activated B cells (F) looking from the *d-V<sub>H</sub>* viewpoint. Different alleles are depicted below each other, from top to bottom: P = productive allele in B cells, NP = non-productive allele in B cells, T = T cells, FB = fetal brain. Red arrows depict the 4C viewpoints. Significance of the interactions is indicated by the range in color used in the domainogram as depicted in the legend: black is low significance ( $P = 1$ ) and yellow represents high significance ( $P = 10^{-10}$ ) of interaction.

#### **Supplemental figure 8. Verification of 4C by DNA FISH.**

(A) Schematic representation of the probe positions. Green arrows depict the positions of the probes used to verify the 4C interaction, the red arrow depicts the position of the probe used as a negative control, the black arrow depicts probe that is used to visualize the *IgH* locus. (B) Representative pictures of the DNA

FISH, showing an interaction A (i) and the negative control (ii). Scale bar represents 4 $\mu$ m. (C) Cumulative fractions of cells plotted as a function of the distance between the test probe and the probe for the *IgH* locus. A minimum of 50 cells was counted per probe set.

**Supplemental figure 9. *Cis* contacts of the *IgH* locus at the C57BL/6 allele.**

(A-F) Domainograms showing chromosome-wide interactions of the C57Bl/6 allele, in resting (A) or activated B cells (B) looking from the *C $\gamma$ 3* 4C viewpoint; in resting (C) or activated B cells (D) looking from the *d-V<sub>H</sub>* viewpoint; in resting (E) or activated B cells (F) looking from the *Up-IgH* viewpoint. Different alleles are depicted below each other, from top to bottom: P = productive allele in B cells, NP = non-productive allele in B cells, T = T cells, FB = fetal brain. Red arrows depict the 4C viewpoints. Significance of the interactions is indicated by the range in color used in the domainogram as depicted in the legend: black is low significance ( $P = 1$ ) and yellow represents high significance ( $P = 10^{-10}$ ) of interaction.

**Supplemental figure 10. Correlation of *cis* contacts.**

(A,B) Correlation plots of the interactions looking from the *C $\gamma$ 3* viewpoint in resting (A) or activated (B) B cells (window size 21). The numbers represent the Spearman rank correlation coefficient, colors range from linear anti-correlation (black) to linear correlation (dark red). Cell types and the alleles are depicted along the X and Y-axis; B cells productive (P), B cell non-productive (NP), T cell (T), fetal brain (FB), C57BL/6 allele (B16) and FVB allele (FVB). (C,D) Correlation plots of the interactions looking from the *d-V<sub>H</sub>* viewpoint in resting (C) and activated (D) B cells (window size 21). (E,F) Correlation plots of the interactions looking from the *Up-IgH* viewpoint in resting (E) and activated (F) B cells.

**Supplemental figure 11. Correlation of *trans* contacts.**

(A,B) Correlation plot of the interactions looking from the *3'RR* viewpoint in resting (A) and activated (B) B cells (window size 21). The numbers represent the Spearman rank correlation coefficient, colors range from linear anti-correlation (black) to linear correlation (dark red). Cell types and the alleles are depicted along the X and Y-axis; B cells productive (P), B cell non-productive (NP), T cell (T), fetal brain (FB), C57BL/6 allele (B16) and FVB allele (FVB). (C,D) Correlation plot of the interactions looking from the *C $\gamma$ 3* viewpoint in resting (C) and activated (D) B cells. (E,F) Correlation plot of the interactions looking from the *d-V<sub>H</sub>* viewpoint in resting (E) and activated (F) B cells. (G,H) Correlation plot of the interactions looking from the *Up-IgH* viewpoint in resting (G) and activated (H) B cells.

**Supplemental figure 12. (A).** Correlation plot of the interactions of C57BL/6 viewpoints in *cis*, in resting B cells. The X-axis shows the productive (P) and the non-productive (NP) C57Bl/6 alleles looking from the four 4C viewpoints. The *IgH* locus with the position of the 4C viewpoints is drawn to scale below the X-axis. The numbers represent the Spearman rank correlation coefficients, colors range from linear anti-correlation (black) to linear correlation (dark red). The dotted line represent the topological border that is present between the *d-V<sub>H</sub>* and the *Up-IgH* 4C viewpoints. **(B)** Correlation plot of the interactions of C57BL/6 viewpoints in *cis* in resting T cells.

**Supplemental figure 13. Clustering of gene expression data in resting and activated B and T cells.** Hierarchical clustering of microarray data in resting B and T cells. On the horizontal axis the tissues and the microarray experiments are depicted, highlighted in colors. The numbers refer to the biological triplo experiments per cell type. The vertical axis shows the names of the 9 different clusters. The name of a cluster depicts the tissue and the up/down regulation of the genes that define the specific cluster.

Supplemental table 1.  
Antibodies used in FACS/MACS

| <b>Table S1.1 MACS on B cells</b>           |                |                       |
|---------------------------------------------|----------------|-----------------------|
| <b>Name</b>                                 | <b>Company</b> | <b>Product number</b> |
| CD5                                         | BD             | 553019                |
| CD43                                        | ebioscience    | 13-0431-85            |
| CD138                                       | BD             | 553713                |
| CD11b                                       | BD             | 553309                |
| Ly-6G (GR-1)                                | ebioscience    | 13-5931-85            |
| TER-119                                     | ebioscience    | 13-5921-85            |
| <b>Table S1.2 MACS on T cells</b>           |                |                       |
| <b>Name</b>                                 | <b>Company</b> | <b>Product number</b> |
| CD45R/B220                                  | BD             | 553085                |
| NK-1.1                                      | BD             | 553163                |
| CD11b                                       | BD             | 553309                |
| GR-1                                        | ebioscience    | 13-5931-85            |
| TER-119                                     | ebioscience    | 13-5921-85            |
| <b>Table S1.3 Allotypic FACS on B cells</b> |                |                       |
| <b>Name</b>                                 | <b>Company</b> | <b>Product number</b> |
| CD19 PerCP-Cy5.5                            | ebioscience    | 45-0193-82            |
| CD45R (B220) FITC                           | ebioscience    | 11-0452-86            |
| IgMa                                        | BD             | 553517                |
| IgMb                                        | BD             | 553519                |
| Streptavidin APC                            | ebioscience    | 17-4317-82            |

Supplemental table 2.

| EntrezID | gene symbols | gene description                        | Fold Change (D4/ D0) | P value |
|----------|--------------|-----------------------------------------|----------------------|---------|
| 11628    | Aicda        | activation-induced cytidine deaminase   | 79.34                | 0       |
| 16192    | Il5ra        | interleukin 5 receptor, alpha           | 15.45                | 0       |
| 12505    | Cd44         | CD44 antigen                            | 5.06                 | 0       |
| 14102    | Fas          | Fas (TNF receptor superfamily member 6) | 7.31                 | 0       |
| 12444    | Ccnd2        | cyclin D2                               | 7.06                 | 0       |
| 17869    | Myc          | myelocytomatosis oncogene               | 1.99                 | 0       |

Supplemental Table 3a.

Upregulated genes in cycling B and T cells (day 4)

| GOBPID     | Pvalue | OddsRatio | ExpCount | Count | Size | Term                                                    |
|------------|--------|-----------|----------|-------|------|---------------------------------------------------------|
| GO:0000278 | 0      | 8.54506   | 23       | 131   | 493  | mitotic cell cycle                                      |
| GO:0048285 | 0      | 11.77863  | 15       | 107   | 313  | organelle fission                                       |
| GO:0000279 | 0      | 9.07895   | 17       | 106   | 377  | M phase                                                 |
| GO:0051301 | 0      | 9.54178   | 16       | 101   | 344  | cell division                                           |
| GO:0022402 | 0      | 6.97876   | 17       | 87    | 394  | cell cycle process                                      |
| GO:0007067 | 0      | 12.09882  | 8        | 61    | 175  | mitosis                                                 |
| GO:0006807 | 0      | 2.26305   | 219      | 370   | 4649 | nitrogen compound metabolic process                     |
| GO:0071840 | 0      | 2.32487   | 165      | 300   | 3515 | cellular component organization or biogenesis           |
| GO:0007059 | 0      | 13.50008  | 5        | 38    | 98   | chromosome segregation                                  |
| GO:0006281 | 0      | 5.56945   | 15       | 66    | 321  | DNA repair                                              |
| GO:0006139 | 0      | 2.1394    | 192      | 320   | 4185 | nucleobase-containing compound metabolic process        |
| GO:0051325 | 0      | 6.95954   | 9        | 47    | 190  | interphase                                              |
| GO:0071842 | 0      | 2.23124   | 119      | 219   | 2601 | cellular component organization at cellular level       |
| GO:0006323 | 0      | 10.96241  | 5        | 33    | 96   | DNA packaging                                           |
| GO:0007017 | 0      | 5.67163   | 11       | 49    | 235  | microtubule-based process                               |
| GO:0045786 | 0      | 5.03255   | 13       | 54    | 282  | negative regulation of cell cycle                       |
| GO:0051276 | 0      | 3.44368   | 27       | 80    | 586  | chromosome organization                                 |
| GO:0044249 | 0      | 1.95967   | 171      | 275   | 3740 | cellular biosynthetic process                           |
| GO:0010564 | 0      | 6.69623   | 7        | 34    | 144  | regulation of cell cycle process                        |
| GO:0006310 | 0      | 6.07653   | 8        | 36    | 160  | DNA recombination                                       |
| GO:0006260 | 0      | 5.90243   | 7        | 34    | 158  | DNA replication                                         |
| GO:0006259 | 0      | 6.31407   | 6        | 31    | 145  | DNA metabolic process                                   |
| GO:0009161 | 0      | 18.29423  | 2        | 16    | 34   | ribonucleoside monophosphate metabolic process          |
| GO:0044281 | 0      | 2.29552   | 54       | 110   | 1205 | small molecule metabolic process                        |
| GO:0007049 | 0      | 4.24271   | 11       | 40    | 284  | cell cycle                                              |
| GO:0006270 | 0      | 41.00556  | 1        | 12    | 18   | DNA-dependent DNA replication initiation                |
| GO:0009124 | 0      | 19.27525  | 1        | 15    | 31   | nucleoside monophosphate biosynthetic process           |
| GO:0051321 | 0      | 5.47345   | 7        | 30    | 144  | meiotic cell cycle                                      |
| GO:0009126 | 0      | 19.16923  | 1        | 14    | 29   | purine nucleoside monophosphate metabolic process       |
| GO:0006950 | 0      | 1.90543   | 94       | 158   | 1987 | response to stress                                      |
| GO:0044238 | 0      | 2.6557    | 32       | 73    | 960  | primary metabolic process                               |
| GO:0006695 | 0      | 14.0138   | 2        | 15    | 37   | cholesterol biosynthetic process                        |
| GO:0000724 | 0      | 12.19019  | 2        | 16    | 43   | double-strand break repair via homologous recombination |
| GO:0031570 | 0      | 7.64185   | 3        | 20    | 74   | DNA integrity checkpoint                                |
| GO:0000082 | 0      | 6.40178   | 4        | 22    | 93   | G1/S transition of mitotic cell cycle                   |
| GO:0009059 | 0      | 1.66461   | 158      | 231   | 3356 | macromolecule biosynthetic process                      |
| GO:0016125 | 0      | 5.79801   | 5        | 23    | 105  | sterol metabolic process                                |
| GO:0006333 | 0      | 6.76234   | 4        | 20    | 81   | chromatin assembly or disassembly                       |
| GO:0007010 | 0      | 2.39708   | 33       | 71    | 699  | cytoskeleton organization                               |
| GO:0006261 | 0      | 10.41903  | 2        | 15    | 45   | DNA-dependent DNA replication                           |
| GO:0031023 | 0      | 8.32886   | 3        | 17    | 59   | microtubule organizing center organization              |
| GO:0007093 | 0      | 7.56455   | 3        | 18    | 67   | mitotic cell cycle checkpoint                           |
| GO:0000070 | 0      | 14.5914   | 1        | 12    | 29   | mitotic sister chromatid segregation                    |
| GO:0019320 | 0      | 6.99212   | 3        | 18    | 71   | hexose catabolic process                                |
| GO:0007076 | 0      | 54.44075  | 1        | 8     | 11   | mitotic chromosome condensation                         |
| GO:0042180 | 0      | 2.31844   | 33       | 70    | 709  | cellular ketone metabolic process                       |
| GO:0019752 | 0      | 2.34955   | 32       | 68    | 680  | carboxylic acid metabolic process                       |
| GO:0006753 | 0      | 2.07829   | 47       | 89    | 1002 | nucleoside phosphate metabolic process                  |
| GO:0006334 | 0      | 8.80246   | 2        | 15    | 50   | nucleosome assembly                                     |
| GO:0009259 | 0      | 2.28875   | 34       | 70    | 717  | ribonucleotide metabolic process                        |
| GO:0009152 | 0      | 7.16838   | 3        | 17    | 66   | purine ribonucleotide biosynthetic process              |
| GO:0043412 | 0      | 1.70518   | 107      | 165   | 2282 | macromolecule modification                              |
| GO:0019538 | 0      | 1.58871   | 164      | 231   | 3479 | protein metabolic process                               |
| GO:0006793 | 0      | 1.78464   | 80       | 130   | 1703 | phosphorus metabolic process                            |
| GO:0006096 | 0      | 7.70006   | 3        | 15    | 55   | glycolysis                                              |
| GO:0034453 | 0      | 11.17363  | 2        | 12    | 34   | microtubule anchoring                                   |
| GO:0090407 | 0      | 3.28595   | 12       | 34    | 249  | organophosphate biosynthetic process                    |
| GO:0009056 | 0      | 1.78054   | 79       | 128   | 1707 | catabolic process                                       |
| GO:0034502 | 0      | 15.73039  | 1        | 10    | 23   | protein localization to chromosome                      |
| GO:0034622 | 0      | 2.66294   | 19       | 46    | 407  | cellular macromolecular complex assembly                |
| GO:0033043 | 0      | 2.58747   | 21       | 48    | 436  | regulation of organelle organization                    |



## Supplemental Figure 3b.

Upregulated genes in cycling B and T cells (day 4)

| GOBPID     | Pvalue  | OddsRatio | ExpCount | Count | Size | Term                                                            |
|------------|---------|-----------|----------|-------|------|-----------------------------------------------------------------|
| GO:0031572 | 0       | 11.84848  | 1        | 11    | 30   | G2/M transition DNA damage checkpoint                           |
| GO:0000090 | 0       | 122.23425 | 0        | 6     | 7    | mitotic anaphase                                                |
| GO:0071824 | 0       | 5.36608   | 4        | 18    | 87   | protein-DNA complex subunit organization                        |
| GO:0009168 | 0       | 23.43048  | 1        | 8     | 15   | purine ribonucleoside monophosphate biosynthetic process        |
| GO:0044260 | 0       | 1.53359   | 181      | 242   | 4444 | cellular macromolecule metabolic process                        |
| GO:0022607 | 0       | 1.83568   | 61       | 102   | 1287 | cellular component assembly                                     |
| GO:0009411 | 0       | 5.14166   | 4        | 18    | 90   | response to UV                                                  |
| GO:0048519 | 0       | 1.56085   | 137      | 194   | 2918 | negative regulation of biological process                       |
| GO:0016053 | 0       | 3.08562   | 12       | 32    | 247  | organic acid biosynthetic process                               |
| GO:0046483 | 0       | 1.88903   | 51       | 88    | 1084 | heterocycle metabolic process                                   |
| GO:0051656 | 0       | 5.66519   | 3        | 16    | 74   | establishment of organelle localization                         |
| GO:0046040 | 0       | 61.11381  | 0        | 6     | 8    | IMP metabolic process                                           |
| GO:0051988 | 0       | 61.11381  | 0        | 6     | 8    | regulation of attachment of spindle microtubules to kinetochore |
| GO:0009163 | 0       | 11.35775  | 1        | 10    | 28   | nucleoside biosynthetic process                                 |
| GO:0000079 | 0       | 6.37934   | 3        | 14    | 59   | regulation of cyclin-dependent protein kinase activity          |
| GO:0031145 | 0       | 23.78761  | 1        | 7     | 13   | dependent protein catabolic process                             |
| GO:0032465 | 0       | 12.25477  | 1        | 9     | 24   | regulation of cytokinesis                                       |
| GO:1901135 | 0       | 1.84115   | 51       | 87    | 1087 | carbohydrate derivative metabolic process                       |
| GO:0016052 | 0       | 4.11627   | 6        | 20    | 120  | carbohydrate catabolic process                                  |
| GO:0007088 | 0       | 5.49526   | 3        | 15    | 71   | regulation of mitosis                                           |
| GO:0044237 | 0       | 2.90157   | 12       | 31    | 396  | cellular metabolic process                                      |
| GO:0051052 | 0       | 3.25354   | 9        | 26    | 191  | regulation of DNA metabolic process                             |
| GO:0043067 | 0       | 1.81461   | 52       | 88    | 1114 | regulation of programmed cell death                             |
| GO:0032392 | 0       | 8.03611   | 2        | 11    | 39   | DNA geometric change                                            |
| GO:0006006 | 0       | 3.43743   | 8        | 24    | 168  | glucose metabolic process                                       |
| GO:0033261 | 0       | 9.29069   | 2        | 10    | 32   | regulation of S phase                                           |
| GO:0009113 | 0       | 101.74945 | 0        | 5     | 6    | purine nucleobase biosynthetic process                          |
| GO:0022900 | 0       | 4.30136   | 5        | 18    | 104  | electron transport chain                                        |
| GO:0050000 | 0       | 13.60354  | 1        | 8     | 20   | chromosome localization                                         |
| GO:0005996 | 0       | 3.08079   | 10       | 27    | 208  | monosaccharide metabolic process                                |
| GO:0070925 | 0       | 4.62463   | 4        | 16    | 87   | organelle assembly                                              |
| GO:0009058 | 0       | 4.76804   | 4        | 15    | 94   | biosynthetic process                                            |
| GO:0009165 | 0       | 2.96522   | 10       | 27    | 216  | nucleotide biosynthetic process                                 |
| GO:0008219 | 0       | 1.68084   | 67       | 104   | 1417 | cell death                                                      |
| GO:0006461 | 0       | 1.97653   | 33       | 61    | 707  | protein complex assembly                                        |
| GO:0008652 | 0       | 4.43642   | 4        | 16    | 90   | cellular amino acid biosynthetic process                        |
| GO:0072528 | 0       | 11.65891  | 1        | 8     | 22   | pyrimidine-containing compound biosynthetic process             |
| GO:0007018 | 0       | 3.79169   | 6        | 19    | 122  | microtubule-based movement                                      |
| GO:0006268 | 0       | 50.87196  | 0        | 5     | 7    | DNA unwinding involved in replication                           |
| GO:0006177 | 0       | Inf       | 0        | 4     | 4    | GMP biosynthetic process                                        |
| GO:0006189 | 0       | Inf       | 0        | 4     | 4    | 'de novo' IMP biosynthetic process                              |
| GO:0006694 | 0.00001 | 3.71906   | 6        | 19    | 124  | steroid biosynthetic process                                    |
| GO:0046034 | 0.00001 | 2.64874   | 13       | 31    | 273  | ATP metabolic process                                           |
| GO:0009628 | 0.00001 | 2.0513    | 28       | 53    | 592  | response to abiotic stimulus                                    |
| GO:0007127 | 0.00001 | 5.32392   | 3        | 13    | 63   | meiosis I                                                       |
| GO:0071777 | 0.00001 | 20.36685  | 1        | 6     | 12   | positive regulation of cell cycle cytokinesis                   |
| GO:0016310 | 0.00001 | 2.64182   | 12       | 30    | 274  | phosphorylation                                                 |
| GO:0055114 | 0.00001 | 1.93898   | 33       | 59    | 705  | oxidation-reduction process                                     |
| GO:0009142 | 0.00001 | 5.58014   | 3        | 12    | 56   | nucleoside triphosphate biosynthetic process                    |
| GO:0051289 | 0.00001 | 5.58014   | 3        | 12    | 56   | protein homotetramerization                                     |
| GO:0006163 | 0.00001 | 1.83307   | 40       | 69    | 858  | purine nucleotide metabolic process                             |
| GO:0008608 | 0.00001 | 34.13519  | 0        | 5     | 8    | attachment of spindle microtubules to kinetochore               |
| GO:0009112 | 0.00001 | 9.5999    | 1        | 8     | 25   | nucleobase metabolic process                                    |
| GO:0090307 | 0.00001 | 17.45635  | 1        | 6     | 13   | spindle assembly involved in mitosis                            |
| GO:0006760 | 0.00002 | 11.88993  | 1        | 7     | 19   | folic acid-containing compound metabolic process                |
| GO:0031324 | 0.00002 | 1.67276   | 58       | 90    | 1224 | negative regulation of cellular metabolic process               |
| GO:0008637 | 0.00002 | 5.22311   | 3        | 12    | 59   | apoptotic mitochondrial changes                                 |
| GO:0010212 | 0.00002 | 4.1545    | 4        | 15    | 89   | response to ionizing radiation                                  |
| GO:0006974 | 0.00002 | 3.68908   | 5        | 17    | 118  | response to DNA damage stimulus                                 |

Supplemental Table 4.

## Upregulated in cycling T cells (day 4)

| GOBPID     | Pvalue  | OddsRatio | ExpCount | Count | Size | Term                                                              |
|------------|---------|-----------|----------|-------|------|-------------------------------------------------------------------|
| GO:0016265 | 0       | 3.89883   | 12       | 37    | 1422 | death                                                             |
| GO:0010740 | 0       | 7.27351   | 3        | 18    | 349  | positive regulation of intracellular protein kinase cascade       |
| GO:0031347 | 0       | 7.35463   | 2        | 15    | 283  | regulation of defense response                                    |
| GO:0006954 | 0       | 7.31752   | 2        | 15    | 297  | inflammatory response                                             |
| GO:0030003 | 0       | 6.6614    | 3        | 16    | 333  | cellular cation homeostasis                                       |
| GO:0051179 | 0       | 2.59032   | 32       | 63    | 3942 | localization                                                      |
| GO:0043067 | 0       | 3.7224    | 9        | 29    | 1114 | regulation of programmed cell death                               |
| GO:0055082 | 0       | 4.69064   | 5        | 21    | 624  | cellular chemical homeostasis                                     |
| GO:0006950 | 0       | 2.97687   | 16       | 40    | 1987 | response to stress                                                |
| GO:0035556 | 0       | 3.25275   | 12       | 33    | 1463 | intracellular signal transduction                                 |
| GO:0048584 | 0       | 3.73271   | 8        | 26    | 981  | positive regulation of response to stimulus                       |
| GO:0008284 | 0       | 4.51236   | 5        | 20    | 613  | positive regulation of cell proliferation                         |
| GO:0032101 | 0       | 5.99022   | 3        | 15    | 343  | regulation of response to external stimulus                       |
| GO:0007204 | 0       | 8.7299    | 1        | 11    | 173  | elevation of cytosolic calcium ion concentration                  |
| GO:0050801 | 0       | 4.3531    | 5        | 20    | 634  | ion homeostasis                                                   |
| GO:0055065 | 0       | 6.1002    | 3        | 14    | 313  | metal ion homeostasis                                             |
| GO:0032943 | 0       | 7.93851   | 2        | 11    | 189  | mononuclear cell proliferation                                    |
| GO:0072507 | 0       | 6.3833    | 2        | 13    | 277  | divalent inorganic cation homeostasis                             |
| GO:0050864 | 0       | 12.98149  | 1        | 8     | 86   | regulation of B cell activation                                   |
| GO:0006810 | 0       | 2.42389   | 26       | 51    | 3180 | transport                                                         |
| GO:0051094 | 0       | 4.02704   | 6        | 20    | 682  | positive regulation of developmental process                      |
| GO:0023056 | 0       | 3.84812   | 6        | 21    | 751  | positive regulation of signaling                                  |
| GO:0009966 | 0       | 2.93753   | 13       | 32    | 1548 | regulation of signal transduction                                 |
| GO:0042110 | 0       | 5.99174   | 2        | 13    | 294  | T cell activation                                                 |
| GO:0002376 | 0       | 3.10477   | 10       | 28    | 1264 | immune system process                                             |
| GO:2000026 | 0       | 3.24303   | 9        | 26    | 1117 | regulation of multicellular organismal development                |
| GO:0050728 | 0       | 14.44165  | 1        | 7     | 68   | negative regulation of inflammatory response                      |
| GO:0060548 | 0       | 4.0246    | 5        | 19    | 645  | negative regulation of cell death                                 |
| GO:0070887 | 0       | 3.1964    | 9        | 26    | 1132 | cellular response to chemical stimulus                            |
| GO:0042592 | 0       | 3.19028   | 9        | 26    | 1134 | homeostatic process                                               |
| GO:0060401 | 0       | 13.3441   | 1        | 7     | 73   | cytosolic calcium ion transport                                   |
| GO:0043066 | 0       | 3.99656   | 5        | 18    | 612  | negative regulation of apoptotic process                          |
| GO:0030334 | 0       | 4.91109   | 3        | 14    | 384  | regulation of cell migration                                      |
| GO:0009893 | 0       | 2.6637    | 15       | 34    | 1812 | positive regulation of metabolic process                          |
| GO:0010647 | 0       | 3.62818   | 6        | 20    | 752  | positive regulation of cell communication                         |
| GO:0001525 | 0       | 5.26738   | 3        | 13    | 332  | angiogenesis                                                      |
| GO:0050670 | 0       | 8.22345   | 1        | 9     | 148  | regulation of lymphocyte proliferation                            |
| GO:0010035 | 0       | 5.65657   | 2        | 12    | 285  | response to inorganic substance                                   |
| GO:0032940 | 0       | 4.0272    | 5        | 17    | 571  | secretion by cell                                                 |
| GO:0070663 | 0.00001 | 7.88069   | 1        | 9     | 154  | regulation of leukocyte proliferation                             |
| GO:0002694 | 0.00001 | 5.51312   | 2        | 12    | 292  | regulation of leukocyte activation                                |
| GO:0051209 | 0.00001 | 15.31893  | 0        | 6     | 55   | release of sequestered calcium ion into cytosol                   |
| GO:0051282 | 0.00001 | 15.31893  | 0        | 6     | 55   | regulation of sequestering of calcium ion                         |
| GO:0002237 | 0.00001 | 6.6408    | 2        | 10    | 202  | response to molecule of bacterial origin                          |
| GO:0045785 | 0.00001 | 8.94427   | 1        | 8     | 121  | positive regulation of cell adhesion                              |
| GO:0006874 | 0.00001 | 5.86852   | 2        | 11    | 251  | cellular calcium ion homeostasis                                  |
| GO:0050776 | 0.00001 | 4.92181   | 3        | 13    | 354  | regulation of immune response                                     |
| GO:0070838 | 0.00001 | 5.3202    | 2        | 12    | 302  | divalent metal ion transport                                      |
| GO:0051270 | 0.00001 | 4.45585   | 3        | 14    | 421  | regulation of cellular component movement                         |
| GO:0030890 | 0.00001 | 20.06598  | 0        | 5     | 36   | positive regulation of B cell proliferation                       |
| GO:0033993 | 0.00001 | 20.06598  | 0        | 5     | 36   | response to lipid                                                 |
| GO:0051241 | 0.00001 | 5.08844   | 3        | 12    | 315  | negative regulation of multicellular organismal process           |
| GO:0040012 | 0.00001 | 4.36809   | 4        | 14    | 429  | regulation of locomotion                                          |
| GO:0002700 | 0.00001 | 13.1634   | 1        | 6     | 63   | regulation of production of molecular mediator of immune response |
| GO:0051238 | 0.00001 | 18.84789  | 0        | 5     | 38   | sequestering of metal ion                                         |
| GO:0001819 | 0.00002 | 6.79357   | 1        | 9     | 177  | positive regulation of cytokine production                        |
| GO:0051247 | 0.00002 | 3.46968   | 6        | 18    | 699  | positive regulation of protein metabolic process                  |
| GO:0044093 | 0.00002 | 3.01306   | 8        | 22    | 993  | positive regulation of molecular function                         |
| GO:0097285 | 0.00002 | 5.20821   | 2        | 11    | 281  | cell-type specific apoptotic process                              |
| GO:0032800 | 0.00002 | 29.10512  | 0        | 4     | 21   | receptor biosynthetic process                                     |
| GO:0061298 | 0.00002 | 29.10512  | 0        | 4     | 21   | retina vasculature development in camera-type eye                 |
| GO:0050867 | 0.00003 | 6.3724    | 2        | 9     | 188  | positive regulation of cell activation                            |
| GO:0043065 | 0.00003 | 3.80005   | 4        | 15    | 527  | positive regulation of apoptotic process                          |
| GO:0048731 | 0.00003 | 2.16325   | 24       | 44    | 2928 | system development                                                |
| GO:0001568 | 0.00004 | 3.9226    | 4        | 14    | 475  | blood vessel development                                          |
| GO:0051707 | 0.00004 | 3.9226    | 4        | 14    | 475  | response to other organism                                        |
| GO:0002673 | 0.00004 | 14.8021   | 0        | 5     | 47   | regulation of acute inflammatory response                         |
| GO:0009894 | 0.00004 | 3.68174   | 4        | 15    | 543  | regulation of catabolic process                                   |
| GO:0042327 | 0.00005 | 3.86248   | 4        | 14    | 482  | positive regulation of phosphorylation                            |
| GO:0010942 | 0.00005 | 3.64622   | 5        | 15    | 548  | positive regulation of cell death                                 |
| GO:0071248 | 0.00005 | 14.1278   | 0        | 5     | 49   | cellular response to metal ion                                    |
| GO:0009653 | 0.00005 | 2.39548   | 15       | 31    | 1793 | anatomical structure morphogenesis                                |
| GO:0010562 | 0.00005 | 3.80414   | 4        | 14    | 489  | positive regulation of phosphorus metabolic process               |
| GO:0045124 | 0.00006 | 22.48446  | 0        | 4     | 26   | regulation of bone resorption                                     |
| GO:0051251 | 0.00006 | 6.54889   | 1        | 8     | 162  | positive regulation of lymphocyte activation                      |
| GO:0048519 | 0.00006 | 2.21842   | 20       | 38    | 2603 | negative regulation of biological process                         |
| GO:0007260 | 0.00006 | 13.51214  | 0        | 5     | 51   | tyrosine phosphorylation of STAT protein                          |
| GO:0048771 | 0.00006 | 7.70614   | 1        | 7     | 121  | tissue remodeling                                                 |
| GO:0008285 | 0.0001  | 3.78556   | 4        | 13    | 454  | negative regulation of cell proliferation                         |

## Supplemental Table 5.

## Upregulated genes in resting T cells (day 0)

| GOBPID     | Pvalue  | OddsRatio | ExpCount | Count | Size | Term                                                               |
|------------|---------|-----------|----------|-------|------|--------------------------------------------------------------------|
| GO:0006793 | 0       | 2.9123    | 20       | 48    | 1703 | phosphorus metabolic process                                       |
| GO:0016310 | 0       | 2.98903   | 16       | 42    | 1427 | phosphorylation                                                    |
| GO:0045321 | 0       | 4.42376   | 6        | 23    | 510  | leukocyte activation                                               |
| GO:0002764 | 0       | 7.92075   | 2        | 12    | 149  | immune response-regulating signaling pathway                       |
| GO:0001817 | 0       | 4.84298   | 4        | 17    | 339  | regulation of cytokine production                                  |
| GO:0050790 | 0       | 2.67374   | 17       | 39    | 1451 | regulation of catalytic activity                                   |
| GO:0034097 | 0       | 4.89087   | 4        | 16    | 315  | response to cytokine stimulus                                      |
| GO:0006952 | 0       | 3.34561   | 8        | 25    | 724  | defense response                                                   |
| GO:0002520 | 0       | 3.65381   | 7        | 22    | 581  | immune system development                                          |
| GO:0019221 | 0       | 6.4876    | 2        | 12    | 179  | cytokine-mediated signaling pathway                                |
| GO:0002684 | 0       | 4.13096   | 5        | 18    | 418  | positive regulation of immune system process                       |
| GO:0006955 | 0       | 3.49269   | 7        | 22    | 606  | immune response                                                    |
| GO:0007243 | 0       | 3.27326   | 8        | 24    | 707  | intracellular protein kinase cascade                               |
| GO:0030097 | 0       | 3.71138   | 6        | 20    | 517  | hemopoiesis                                                        |
| GO:0048584 | 0       | 2.86865   | 11       | 29    | 981  | positive regulation of response to stimulus                        |
| GO:0030155 | 0.00001 | 4.97898   | 3        | 13    | 249  | regulation of cell adhesion                                        |
| GO:0002253 | 0.00001 | 5.84812   | 2        | 11    | 180  | activation of immune response                                      |
| GO:0042110 | 0.00001 | 4.53053   | 3        | 14    | 294  | T cell activation                                                  |
| GO:0023052 | 0.00001 | 1.87004   | 56       | 85    | 4850 | signaling                                                          |
| GO:0007154 | 0.00001 | 1.84918   | 57       | 86    | 4960 | cell communication                                                 |
| GO:0071310 | 0.00001 | 2.84771   | 10       | 25    | 841  | cellular response to organic substance                             |
| GO:2000503 | 0.00001 | 130.99315 | 0        | 3     | 5    | positive regulation of natural killer cell chemotaxis              |
| GO:0030098 | 0.00001 | 4.95649   | 3        | 12    | 230  | lymphocyte differentiation                                         |
| GO:0032651 | 0.00002 | 18.34005  | 0        | 5     | 29   | regulation of interleukin-1 beta production                        |
| GO:0036211 | 0.00002 | 2.11517   | 25       | 47    | 2202 | protein modification process                                       |
| GO:0051716 | 0.00002 | 1.79937   | 61       | 90    | 5346 | cellular response to stimulus                                      |
| GO:0031325 | 0.00002 | 2.24246   | 19       | 39    | 1699 | positive regulation of cellular metabolic process                  |
| GO:0050727 | 0.00002 | 5.73627   | 2        | 10    | 166  | regulation of inflammatory response                                |
| GO:0031401 | 0.00003 | 3.22161   | 6        | 19    | 559  | positive regulation of protein modification process                |
| GO:0032729 | 0.00003 | 16.29971  | 0        | 5     | 32   | positive regulation of interferon-gamma production                 |
| GO:0072678 | 0.00004 | 26.97812  | 0        | 4     | 17   | T cell migration                                                   |
| GO:0050789 | 0.00004 | 1.72679   | 98       | 128   | 8561 | regulation of biological process                                   |
| GO:0019220 | 0.00004 | 2.689     | 10       | 24    | 849  | regulation of phosphate metabolic process                          |
| GO:0048247 | 0.00005 | 25.0498   | 0        | 4     | 18   | lymphocyte chemotaxis                                              |
| GO:0032496 | 0.00005 | 5.19828   | 2        | 10    | 182  | response to lipopolysaccharide                                     |
| GO:0002429 | 0.00005 | 8.05497   | 1        | 7     | 84   | immune response-activating cell surface receptor signaling pathway |
| GO:0035556 | 0.00006 | 2.8586    | 8        | 21    | 756  | intracellular signal transduction                                  |
| GO:0051247 | 0.00006 | 2.84293   | 8        | 21    | 699  | positive regulation of protein metabolic process                   |
| GO:0030335 | 0.00006 | 4.60741   | 3        | 11    | 225  | positive regulation of cell migration                              |
| GO:0002697 | 0.00006 | 5.0501    | 2        | 10    | 187  | regulation of immune effector process                              |
| GO:0006140 | 0.00006 | 3.51825   | 5        | 15    | 401  | regulation of nucleotide metabolic process                         |
| GO:0048585 | 0.00007 | 2.81708   | 8        | 21    | 705  | negative regulation of response to stimulus                        |
| GO:0001932 | 0.00007 | 2.80009   | 8        | 21    | 709  | regulation of protein phosphorylation                              |
| GO:0002758 | 0.00008 | 9.45982   | 1        | 6     | 62   | innate immune response-activating signal transduction              |
| GO:0032612 | 0.00008 | 12.93914  | 0        | 5     | 39   | interleukin-1 production                                           |
| GO:0010820 | 0.00008 | 52.38904  | 0        | 3     | 8    | positive regulation of T cell chemotaxis                           |
| GO:0009607 | 0.00008 | 3.16072   | 6        | 17    | 506  | response to biotic stimulus                                        |
| GO:2000401 | 0.00009 | 20.62601  | 0        | 4     | 21   | regulation of lymphocyte migration                                 |
| GO:0051272 | 0.0001  | 4.36      | 3        | 11    | 237  | positive regulation of cellular component movement                 |
| GO:0045089 | 0.0001  | 7.2086    | 1        | 7     | 93   | positive regulation of innate immune response                      |

## Supplemental Table 6

## Upregulated genes in resting and cycling T cells (day 0 and day 4)

| GOBPID     | Pvalue  | OddsRatio | ExpCount | Count | Size | Term                                                                                                                      |
|------------|---------|-----------|----------|-------|------|---------------------------------------------------------------------------------------------------------------------------|
| GO:0002429 | 0       | 23.37377  | 1        | 16    | 84   | immune response-activating cell surface receptor signaling pathway                                                        |
| GO:0002682 | 0       | 5.36871   | 7        | 32    | 659  | regulation of immune system process                                                                                       |
| GO:0002521 | 0       | 7.52742   | 4        | 23    | 334  | leukocyte differentiation                                                                                                 |
| GO:0048583 | 0       | 3.37403   | 21       | 57    | 1983 | regulation of response to stimulus                                                                                        |
| GO:0050852 | 0       | 55.12212  | 0        | 9     | 25   | T cell receptor signaling pathway                                                                                         |
| GO:0006955 | 0       | 5.43217   | 7        | 30    | 606  | immune response                                                                                                           |
| GO:0002764 | 0       | 11.90977  | 2        | 16    | 149  | immune response-regulating signaling pathway                                                                              |
| GO:0010646 | 0       | 3.62956   | 15       | 45    | 1398 | regulation of cell communication                                                                                          |
| GO:0048534 | 0       | 5.26883   | 6        | 27    | 554  | hemopoietic or lymphoid organ development                                                                                 |
| GO:0002253 | 0       | 9.64278   | 2        | 16    | 180  | activation of immune response                                                                                             |
| GO:0001775 | 0       | 7.89431   | 3        | 18    | 266  | cell activation                                                                                                           |
| GO:0023051 | 0       | 3.06449   | 19       | 49    | 1798 | regulation of signaling                                                                                                   |
| GO:0002696 | 0       | 8.99327   | 2        | 15    | 179  | positive regulation of leukocyte activation                                                                               |
| GO:0050865 | 0       | 6.44446   | 3        | 19    | 313  | regulation of cell activation                                                                                             |
| GO:0048522 | 0       | 2.52074   | 32       | 64    | 2933 | positive regulation of cellular process                                                                                   |
| GO:0045058 | 0       | 60.06281  | 0        | 5     | 13   | T cell selection                                                                                                          |
| GO:0050850 | 0       | 31.55611  | 0        | 6     | 24   | positive regulation of calcium-mediated signaling                                                                         |
| GO:0033077 | 0       | 12.72067  | 1        | 8     | 68   | T cell differentiation in thymus                                                                                          |
| GO:0046632 | 0       | 12.72067  | 1        | 8     | 68   | alpha-beta T cell differentiation                                                                                         |
| GO:0001816 | 0       | 4.57853   | 4        | 17    | 382  | cytokine production                                                                                                       |
| GO:0051249 | 0       | 9.52811   | 1        | 9     | 103  | regulation of lymphocyte activation                                                                                       |
| GO:0046649 | 0       | 7.94776   | 1        | 10    | 144  | lymphocyte activation                                                                                                     |
| GO:0009967 | 0       | 3.56267   | 7        | 22    | 663  | positive regulation of signal transduction                                                                                |
| GO:0019932 | 0       | 7.80898   | 1        | 10    | 133  | second-messenger-mediated signaling                                                                                       |
| GO:0009968 | 0       | 3.74291   | 6        | 20    | 549  | negative regulation of signal transduction                                                                                |
| GO:0046651 | 0       | 17.34349  | 0        | 6     | 40   | lymphocyte proliferation                                                                                                  |
| GO:0070661 | 0       | 16.84175  | 0        | 6     | 41   | leukocyte proliferation                                                                                                   |
| GO:0045060 | 0.00001 | 46.89461  | 0        | 4     | 12   | negative thymic T cell selection                                                                                          |
| GO:0042102 | 0.00001 | 11.45831  | 1        | 7     | 65   | positive regulation of T cell proliferation                                                                               |
| GO:0010941 | 0.00001 | 2.70158   | 12       | 30    | 1154 | regulation of cell death                                                                                                  |
| GO:0042981 | 0.00001 | 2.72538   | 12       | 29    | 1103 | regulation of apoptotic process                                                                                           |
| GO:0007166 | 0.00001 | 2.06487   | 33       | 58    | 3077 | cell surface receptor signaling pathway                                                                                   |
| GO:0043368 | 0.00001 | 41.68192  | 0        | 4     | 13   | positive T cell selection                                                                                                 |
| GO:0006796 | 0.00001 | 2.34619   | 18       | 38    | 1703 | phosphate-containing compound metabolic process                                                                           |
| GO:0050870 | 0.00001 | 13.31399  | 1        | 6     | 50   | positive regulation of T cell activation                                                                                  |
| GO:0048519 | 0.00001 | 2.04386   | 31       | 55    | 2918 | negative regulation of biological process                                                                                 |
| GO:0050670 | 0.00003 | 6.18264   | 2        | 9     | 148  | regulation of lymphocyte proliferation                                                                                    |
| GO:0006464 | 0.00003 | 2.11141   | 24       | 44    | 2202 | cellular protein modification process                                                                                     |
| GO:0042035 | 0.00004 | 8.51135   | 1        | 7     | 85   | regulation of cytokine biosynthetic process                                                                               |
| GO:0043412 | 0.00004 | 2.08616   | 25       | 45    | 2282 | macromolecule modification                                                                                                |
| GO:0030217 | 0.00004 | 14.86076  | 0        | 5     | 39   | T cell differentiation                                                                                                    |
| GO:0070663 | 0.00004 | 5.92494   | 2        | 9     | 154  | regulation of leukocyte proliferation                                                                                     |
| GO:0045621 | 0.00005 | 10.12288  | 1        | 6     | 62   | positive regulation of lymphocyte differentiation                                                                         |
| GO:0016265 | 0.00005 | 2.32191   | 15       | 32    | 1422 | death                                                                                                                     |
| GO:0046640 | 0.00005 | 23.4375   | 0        | 4     | 20   | regulation of alpha-beta T cell proliferation                                                                             |
| GO:0050856 | 0.00005 | 23.4375   | 0        | 4     | 20   | regulation of T cell receptor signaling pathway                                                                           |
| GO:0043068 | 0.00007 | 3.21905   | 6        | 17    | 532  | positive regulation of programmed cell death                                                                              |
| GO:0032673 | 0.00007 | 22.05767  | 0        | 4     | 21   | regulation of interleukin-4 production                                                                                    |
| GO:2000026 | 0.00007 | 2.47036   | 12       | 27    | 1117 | regulation of multicellular organismal development                                                                        |
| GO:0002460 | 0.00008 | 5.50396   | 2        | 9     | 165  | adaptive immune response based on somatic recombination of immune receptors built from immunoglobulin superfamily domains |
| GO:0051716 | 0.00008 | 1.7509    | 57       | 83    | 5346 | cellular response to stimulus                                                                                             |
| GO:0018108 | 0.00008 | 4.88173   | 2        | 10    | 206  | peptidyl-tyrosine phosphorylation                                                                                         |
| GO:0032946 | 0.00009 | 7.37186   | 1        | 7     | 97   | positive regulation of mononuclear cell proliferation                                                                     |
| GO:0046631 | 0.00009 | 20.47476  | 0        | 4     | 23   | alpha-beta T cell activation                                                                                              |
| GO:0006917 | 0.00009 | 4.07976   | 3        | 12    | 295  | induction of apoptosis                                                                                                    |
| GO:0042107 | 0.00009 | 7.29047   | 1        | 7     | 98   | cytokine metabolic process                                                                                                |
| GO:0050857 | 0.0001  | 46.67073  | 0        | 3     | 9    | positive regulation of antigen receptor-mediated signaling pathway                                                        |

## Supplemental Table 7.

### Genes down-regulated in cycling T cells (day 4)

| GOBPID     | Pvalue  | OddsRatio | ExpCount | Count | Size | Term                                                                                                                      |
|------------|---------|-----------|----------|-------|------|---------------------------------------------------------------------------------------------------------------------------|
| GO:0002684 | 0       | 9.33713   | 2        | 14    | 418  | positive regulation of immune system process                                                                              |
| GO:0050776 | 0       | 9.22173   | 2        | 12    | 354  | regulation of immune response                                                                                             |
| GO:0019884 | 0       | 60.9019   | 0        | 5     | 25   | antigen processing and presentation of exogenous antigen                                                                  |
| GO:0019886 | 0       | 106.97778 | 0        | 4     | 13   | antigen processing and presentation of exogenous peptide antigen via MHC class II                                         |
| GO:0002252 | 0       | 8.51482   | 2        | 11    | 346  | immune effector process                                                                                                   |
| GO:0048002 | 0       | 40.58017  | 0        | 5     | 35   | antigen processing and presentation of peptide antigen                                                                    |
| GO:0042113 | 0       | 12.56908  | 1        | 8     | 168  | B cell activation                                                                                                         |
| GO:0002504 | 0       | 74.04615  | 0        | 4     | 17   | antigen processing and presentation of peptide or polysaccharide antigen via MHC class II                                 |
| GO:0006959 | 0       | 21.40022  | 0        | 6     | 75   | humoral immune response                                                                                                   |
| GO:0032943 | 0       | 11.09858  | 1        | 8     | 189  | mononuclear cell proliferation                                                                                            |
| GO:0002757 | 0       | 13.07724  | 1        | 7     | 140  | immune response-activating signal transduction                                                                            |
| GO:0045089 | 0       | 16.95668  | 0        | 6     | 93   | positive regulation of innate immune response                                                                             |
| GO:0050670 | 0       | 12.33011  | 1        | 7     | 148  | regulation of lymphocyte proliferation                                                                                    |
| GO:0070663 | 0       | 11.82313  | 1        | 7     | 154  | regulation of leukocyte proliferation                                                                                     |
| GO:0045087 | 0.00001 | 11.03123  | 1        | 7     | 177  | innate immune response                                                                                                    |
| GO:0006950 | 0.00001 | 3.32145   | 9        | 23    | 1987 | response to stress                                                                                                        |
| GO:0050868 | 0.00001 | 19.6029   | 0        | 5     | 67   | negative regulation of T cell activation                                                                                  |
| GO:0050867 | 0.00002 | 9.58513   | 1        | 7     | 188  | positive regulation of cell activation                                                                                    |
| GO:0016064 | 0.00004 | 14.80627  | 0        | 5     | 87   | immunoglobulin mediated immune response                                                                                   |
| GO:0002449 | 0.00005 | 10.07323  | 1        | 6     | 152  | lymphocyte mediated immunity                                                                                              |
| GO:0051251 | 0.00007 | 9.42258   | 1        | 6     | 162  | positive regulation of lymphocyte activation                                                                              |
| GO:0002460 | 0.00008 | 9.24335   | 1        | 6     | 165  | adaptive immune response based on somatic recombination of immune receptors built from immunoglobulin superfamily domains |
| GO:0002695 | 0.0001  | 12.00902  | 0        | 5     | 106  | negative regulation of leukocyte activation                                                                               |

Supplemental Table 8.  
Down regulated genes in cycling B and T cells (day 4)

| GOBPID     | Pvalue  | OddsRatio | ExpCount | Count | Size | Term                                                        |
|------------|---------|-----------|----------|-------|------|-------------------------------------------------------------|
| GO:0080090 | 0       | 2.22066   | 84       | 149   | 3828 | regulation of primary metabolic process                     |
| GO:0051171 | 0       | 2.24085   | 67       | 123   | 3017 | regulation of nitrogen compound metabolic process           |
| GO:0051252 | 0       | 2.18627   | 56       | 104   | 2533 | regulation of RNA metabolic process                         |
| GO:0035556 | 0       | 2.5116    | 32       | 71    | 1463 | intracellular signal transduction                           |
| GO:0032774 | 0       | 2.02833   | 56       | 99    | 2550 | RNA biosynthetic process                                    |
| GO:0036211 | 0       | 2.09467   | 49       | 89    | 2202 | protein modification process                                |
| GO:0048534 | 0       | 3.16594   | 12       | 35    | 554  | hemopoietic or lymphoid organ development                   |
| GO:0001775 | 0       | 3.01635   | 13       | 35    | 579  | cell activation                                             |
| GO:0010627 | 0       | 3.04833   | 12       | 33    | 539  | regulation of intracellular protein kinase cascade          |
| GO:0018193 | 0       | 2.8953    | 13       | 34    | 583  | peptidyl-amino acid modification                            |
| GO:0009966 | 0       | 2.39564   | 21       | 46    | 1009 | regulation of signal transduction                           |
| GO:0034645 | 0       | 1.77418   | 72       | 112   | 3271 | cellular macromolecule biosynthetic process                 |
| GO:0016310 | 0       | 2.09951   | 31       | 60    | 1427 | phosphorylation                                             |
| GO:0010556 | 0       | 2.06894   | 34       | 63    | 1622 | regulation of macromolecule biosynthetic process            |
| GO:0031326 | 0       | 2.03705   | 34       | 63    | 1650 | regulation of cellular biosynthetic process                 |
| GO:0002684 | 0       | 3.06491   | 9        | 26    | 418  | positive regulation of immune system process                |
| GO:0002694 | 0       | 3.5598    | 6        | 21    | 292  | regulation of leukocyte activation                          |
| GO:0048523 | 0       | 1.77365   | 58       | 92    | 2629 | negative regulation of cellular process                     |
| GO:0044093 | 0       | 2.2335    | 22       | 45    | 993  | positive regulation of molecular function                   |
| GO:0006357 | 0.00001 | 2.10206   | 26       | 50    | 1173 | regulation of transcription from RNA polymerase II promoter |
| GO:0043065 | 0.00001 | 2.69569   | 12       | 29    | 527  | positive regulation of apoptotic process                    |
| GO:0090304 | 0.00001 | 1.65593   | 79       | 115   | 3560 | nucleic acid metabolic process                              |
| GO:0050790 | 0.00001 | 1.97792   | 32       | 58    | 1451 | regulation of catalytic activity                            |
| GO:0034641 | 0.00001 | 1.59581   | 102      | 141   | 4607 | cellular nitrogen compound metabolic process                |
| GO:0031329 | 0.00001 | 2.75824   | 11       | 27    | 479  | regulation of cellular catabolic process                    |
| GO:0046649 | 0.00001 | 2.85054   | 9        | 25    | 429  | lymphocyte activation                                       |
| GO:0010467 | 0.00001 | 1.61989   | 83       | 119   | 3763 | gene expression                                             |
| GO:0006955 | 0.00001 | 2.49783   | 13       | 31    | 606  | immune response                                             |
| GO:0010942 | 0.00001 | 2.58366   | 12       | 29    | 548  | positive regulation of cell death                           |
| GO:0043123 | 0.00002 | 5.41205   | 2        | 11    | 103  | positive regulation of I-kappaB kinase/NF-kappaB cascade    |
| GO:0009893 | 0.00002 | 1.83199   | 40       | 67    | 1812 | positive regulation of metabolic process                    |
| GO:0009058 | 0.00002 | 1.58493   | 92       | 128   | 4152 | biosynthetic process                                        |
| GO:0001932 | 0.00002 | 2.3387    | 16       | 34    | 709  | regulation of protein phosphorylation                       |
| GO:0051270 | 0.00002 | 2.77891   | 9        | 24    | 421  | regulation of cellular component movement                   |
| GO:0044267 | 0.00002 | 1.66711   | 63       | 94    | 2834 | cellular protein metabolic process                          |
| GO:0050793 | 0.00002 | 1.92292   | 31       | 55    | 1406 | regulation of developmental process                         |
| GO:0043547 | 0.00003 | 3.47679   | 5        | 17    | 240  | positive regulation of GTPase activity                      |
| GO:0050789 | 0.00003 | 1.53812   | 148      | 187   | 7155 | regulation of biological process                            |
| GO:0006355 | 0.00003 | 1.99843   | 27       | 49    | 1287 | regulation of transcription, DNA-dependent                  |
| GO:0046578 | 0.00003 | 3.31387   | 6        | 18    | 266  | regulation of Ras protein signal transduction               |
| GO:0030099 | 0.00003 | 3.43009   | 5        | 17    | 243  | myeloid cell differentiation                                |
| GO:0043067 | 0.00003 | 2.01835   | 25       | 46    | 1114 | regulation of programmed cell death                         |
| GO:0018107 | 0.00003 | 7.35395   | 1        | 8     | 57   | peptidyl-threonine phosphorylation                          |
| GO:0008360 | 0.00004 | 5.50974   | 2        | 10    | 92   | regulation of cell shape                                    |
| GO:0031328 | 0.00004 | 1.96503   | 27       | 49    | 1220 | positive regulation of cellular biosynthetic process        |
| GO:0050863 | 0.00004 | 3.92551   | 4        | 14    | 176  | regulation of T cell activation                             |
| GO:0002274 | 0.00004 | 4.92743   | 2        | 11    | 112  | myeloid leukocyte activation                                |
| GO:0010557 | 0.00004 | 1.99068   | 25       | 46    | 1128 | positive regulation of macromolecule biosynthetic process   |
| GO:0006911 | 0.00005 | 16.00203  | 0        | 5     | 19   | phagocytosis, engulfment                                    |
| GO:0033124 | 0.00005 | 3.15889   | 6        | 18    | 278  | regulation of GTP catabolic process                         |
| GO:0002521 | 0.00006 | 2.9121    | 7        | 20    | 334  | leukocyte differentiation                                   |
| GO:0006793 | 0.00006 | 1.78879   | 38       | 62    | 1703 | phosphorus metabolic process                                |
| GO:0019220 | 0.00007 | 2.11592   | 19       | 37    | 849  | regulation of phosphate metabolic process                   |
| GO:0010035 | 0.00007 | 3.07492   | 6        | 18    | 285  | response to inorganic substance                             |
| GO:0048584 | 0.00007 | 2.03192   | 22       | 41    | 981  | positive regulation of response to stimulus                 |
| GO:0001817 | 0.00007 | 2.86568   | 7        | 20    | 339  | regulation of cytokine production                           |
| GO:0002697 | 0.00007 | 3.67375   | 4        | 14    | 187  | regulation of immune effector process                       |
| GO:0045619 | 0.00009 | 4.90825   | 2        | 10    | 102  | regulation of lymphocyte differentiation                    |
| GO:0051247 | 0.00009 | 2.21722   | 15       | 32    | 699  | positive regulation of protein metabolic process            |
| GO:0051592 | 0.00009 | 6.31914   | 1        | 8     | 65   | response to calcium ion                                     |



Supplemental Table 9.  
Upregulated genes in B cells (resting and cycling cells)

| GOBPID     | Pvalue  | OddsRatio | ExpCount | Count | Size | Term                                                                                                                      |
|------------|---------|-----------|----------|-------|------|---------------------------------------------------------------------------------------------------------------------------|
| GO:0006955 | 0       | 5.54409   | 10       | 47    | 606  | immune response                                                                                                           |
| GO:0002764 | 0       | 10.73164  | 3        | 22    | 149  | immune response-regulating signaling pathway                                                                              |
| GO:0050853 | 0       | 36.75176  | 0        | 11    | 29   | B cell receptor signaling pathway                                                                                         |
| GO:0002253 | 0       | 7.67997   | 3        | 20    | 180  | activation of immune response                                                                                             |
| GO:0002504 | 0       | 52.97945  | 0        | 8     | 17   | antigen processing and presentation of peptide or polysaccharide antigen via MHC class II                                 |
| GO:0002252 | 0       | 6.09514   | 4        | 21    | 238  | immune effector process                                                                                                   |
| GO:0006793 | 0       | 2.52925   | 29       | 63    | 1703 | phosphorus metabolic process                                                                                              |
| GO:0016310 | 0       | 2.60126   | 24       | 55    | 1427 | phosphorylation                                                                                                           |
| GO:0042113 | 0       | 10.75273  | 1        | 12    | 82   | B cell activation                                                                                                         |
| GO:0002429 | 0       | 10.02646  | 1        | 12    | 84   | immune response-activating cell surface receptor signaling pathway                                                        |
| GO:0002460 | 0       | 6.5165    | 3        | 16    | 165  | adaptive immune response based on somatic recombination of immune receptors built from immunoglobulin superfamily domains |
| GO:0050670 | 0       | 6.82801   | 3        | 15    | 148  | regulation of lymphocyte proliferation                                                                                    |
| GO:0019886 | 0       | 50.77437  | 0        | 6     | 13   | antigen processing and presentation of exogenous peptide antigen via MHC class II                                         |
| GO:0070663 | 0       | 6.5312    | 3        | 15    | 154  | regulation of leukocyte proliferation                                                                                     |
| GO:0009617 | 0       | 4.35393   | 6        | 22    | 332  | response to bacterium                                                                                                     |
| GO:0065009 | 0       | 2.24815   | 31       | 62    | 1855 | regulation of molecular function                                                                                          |
| GO:0001816 | 0       | 3.93316   | 6        | 23    | 382  | cytokine production                                                                                                       |
| GO:0002684 | 0       | 4.3122    | 5        | 20    | 310  | positive regulation of immune system process                                                                              |
| GO:0051704 | 0       | 2.96015   | 12       | 31    | 681  | multi-organism process                                                                                                    |
| GO:0002694 | 0       | 4.23661   | 5        | 19    | 292  | regulation of leukocyte activation                                                                                        |
| GO:0050864 | 0       | 9.90706   | 1        | 9     | 64   | regulation of B cell activation                                                                                           |
| GO:0048002 | 0       | 14.83906  | 1        | 7     | 35   | antigen processing and presentation of peptide antigen                                                                    |
| GO:0048584 | 0       | 2.52086   | 17       | 38    | 981  | positive regulation of response to stimulus                                                                               |
| GO:0002449 | 0       | 5.62432   | 3        | 13    | 152  | lymphocyte mediated immunity                                                                                              |
| GO:0002520 | 0       | 3.00022   | 10       | 27    | 581  | immune system development                                                                                                 |
| GO:0002281 | 0       | 32.80366  | 0        | 5     | 14   | macrophage activation involved in immune response                                                                         |
| GO:0030889 | 0       | 32.80366  | 0        | 5     | 14   | negative regulation of B cell proliferation                                                                               |
| GO:0032496 | 0       | 5.0197    | 3        | 14    | 182  | response to lipopolysaccharide                                                                                            |
| GO:0019884 | 0       | 18.69454  | 0        | 6     | 25   | antigen processing and presentation of exogenous antigen                                                                  |
| GO:0035556 | 0       | 2.19489   | 25       | 49    | 1463 | intracellular signal transduction                                                                                         |
| GO:0043547 | 0       | 4.31741   | 4        | 16    | 240  | positive regulation of GTPase activity                                                                                    |
| GO:0030811 | 0       | 3.84343   | 5        | 18    | 302  | regulation of nucleotide catabolic process                                                                                |
| GO:0006954 | 0       | 3.52679   | 6        | 20    | 365  | inflammatory response                                                                                                     |
| GO:0010604 | 0.00001 | 2.07783   | 28       | 53    | 1673 | positive regulation of macromolecule metabolic process                                                                    |
| GO:0071900 | 0.00001 | 3.78024   | 5        | 17    | 289  | regulation of protein serine/threonine kinase activity                                                                    |
| GO:0002758 | 0.00001 | 8.80901   | 1        | 8     | 62   | innate immune response-activating signal transduction                                                                     |
| GO:0034110 | 0.00001 | 22.70545  | 0        | 5     | 18   | regulation of homotypic cell-cell adhesion                                                                                |
| GO:0043549 | 0.00001 | 2.92217   | 9        | 24    | 526  | regulation of kinase activity                                                                                             |
| GO:0002366 | 0.00001 | 5.48318   | 2        | 11    | 131  | leukocyte activation involved in immune response                                                                          |
| GO:0065008 | 0.00001 | 1.91848   | 35       | 61    | 2092 | regulation of biological quality                                                                                          |
| GO:0002224 | 0.00001 | 10.12706  | 1        | 7     | 48   | toll-like receptor signaling pathway                                                                                      |
| GO:0009607 | 0.00002 | 3.3421    | 6        | 19    | 374  | response to biotic stimulus                                                                                               |
| GO:0071216 | 0.00002 | 5.43757   | 2        | 11    | 132  | cellular response to biotic stimulus                                                                                      |
| GO:0016064 | 0.00002 | 6.87373   | 1        | 9     | 87   | immunoglobulin mediated immune response                                                                                   |
| GO:0010543 | 0.00002 | 19.67598  | 0        | 5     | 20   | regulation of platelet activation                                                                                         |
| GO:0036211 | 0.00002 | 1.88354   | 37       | 63    | 2202 | protein modification process                                                                                              |
| GO:0009894 | 0.00002 | 2.82386   | 9        | 24    | 543  | regulation of catabolic process                                                                                           |
| GO:0043085 | 0.00002 | 3.06905   | 7        | 21    | 455  | positive regulation of catalytic activity                                                                                 |
| GO:0051347 | 0.00002 | 3.3937    | 6        | 18    | 339  | positive regulation of transferase activity                                                                               |
| GO:0033124 | 0.00002 | 3.68376   | 5        | 16    | 278  | regulation of GTP catabolic process                                                                                       |
| GO:0031663 | 0.00002 | 12.2417   | 1        | 6     | 35   | lipopolysaccharide-mediated signaling pathway                                                                             |
| GO:0006952 | 0.00002 | 3.34908   | 6        | 18    | 359  | defense response                                                                                                          |
| GO:0010033 | 0.00002 | 2.07564   | 24       | 45    | 1403 | response to organic substance                                                                                             |
| GO:0045577 | 0.00003 | 17.35934  | 0        | 5     | 22   | regulation of B cell differentiation                                                                                      |
| GO:0045089 | 0.00003 | 6.38073   | 2        | 9     | 93   | positive regulation of innate immune response                                                                             |
| GO:0051241 | 0.00003 | 3.44564   | 5        | 17    | 315  | negative regulation of multicellular organismal process                                                                   |
| GO:0030890 | 0.00003 | 11.83302  | 1        | 6     | 36   | positive regulation of B cell proliferation                                                                               |
| GO:0031323 | 0.00003 | 1.68074   | 65       | 96    | 3867 | regulation of cellular metabolic process                                                                                  |
| GO:0043406 | 0.00003 | 4.98154   | 2        | 11    | 143  | positive regulation of MAP kinase activity                                                                                |
| GO:0044270 | 0.00003 | 2.46658   | 13       | 29    | 751  | cellular nitrogen compound catabolic process                                                                              |
| GO:0032655 | 0.00003 | 11.45071  | 1        | 6     | 37   | regulation of interleukin-12 production                                                                                   |
| GO:0032946 | 0.00004 | 6.08941   | 2        | 9     | 97   | positive regulation of mononuclear cell proliferation                                                                     |
| GO:0030098 | 0.00004 | 3.89427   | 4        | 14    | 230  | lymphocyte differentiation                                                                                                |
| GO:0006470 | 0.00005 | 4.76344   | 3        | 11    | 149  | protein dephosphorylation                                                                                                 |
| GO:0019220 | 0.00005 | 2.33068   | 14       | 31    | 849  | regulation of phosphate metabolic process                                                                                 |
| GO:0045576 | 0.00005 | 10.4387   | 1        | 6     | 40   | mast cell activation                                                                                                      |
| GO:0080090 | 0.00006 | 1.65177   | 65       | 94    | 3828 | regulation of primary metabolic process                                                                                   |
| GO:0045860 | 0.00007 | 3.34655   | 5        | 16    | 304  | positive regulation of protein kinase activity                                                                            |
| GO:0001782 | 0.00007 | 14.04984  | 0        | 5     | 26   | B cell homeostasis                                                                                                        |
| GO:0046700 | 0.00007 | 2.39772   | 13       | 28    | 743  | heterocycle catabolic process                                                                                             |
| GO:0045321 | 0.00007 | 4.53924   | 3        | 11    | 166  | leukocyte activation                                                                                                      |
| GO:0030097 | 0.00007 | 2.69974   | 9        | 22    | 517  | hemopoiesis                                                                                                               |
| GO:0001932 | 0.00008 | 2.42023   | 12       | 27    | 709  | regulation of protein phosphorylation                                                                                     |
| GO:0023051 | 0.00009 | 1.87098   | 30       | 52    | 1798 | regulation of signaling                                                                                                   |
| GO:0012501 | 0.00009 | 2.00401   | 23       | 42    | 1345 | programmed cell death                                                                                                     |
| GO:0050867 | 0.00009 | 4.07922   | 3        | 12    | 188  | positive regulation of cell activation                                                                                    |
| GO:1901292 | 0.00009 | 2.39834   | 12       | 27    | 715  | nucleoside phosphate catabolic process                                                                                    |
| GO:0002700 | 0.00009 | 7.40859   | 1        | 7     | 63   | regulation of production of molecular mediator of immune response                                                         |
| GO:0002699 | 0.00009 | 5.40966   | 2        | 9     | 108  | positive regulation of immune effector process                                                                            |
| GO:0032844 | 0.0001  | 3.56046   | 4        | 14    | 250  | regulation of homeostatic process                                                                                         |
| GO:0042454 | 0.0001  | 2.87925   | 7        | 19    | 418  | ribonucleoside catabolic process                                                                                          |

Supplemental table 10  
Downregulated genes in T cells (Day 0)

| GOBPID     | Pvalue  | OddsRatio | ExpCount | Count | Size | Term                                                   |
|------------|---------|-----------|----------|-------|------|--------------------------------------------------------|
| GO:0006281 | 0,00003 | 6,35353   | 2        | 9     | 321  | DNA repair                                             |
| GO:0008152 | 0,00003 | 2,39456   | 45       | 65    | 9211 | metabolic process                                      |
| GO:0044257 | 0,00004 | 6,15297   | 2        | 9     | 331  | cellular protein catabolic process                     |
| GO:0006511 | 0,00008 | 6,34617   | 1        | 8     | 283  | ubiquitin-dependent protein catabolic process          |
| GO:0043632 | 0,0001  | 6,14214   | 1        | 8     | 292  | modification-dependent macromolecule catabolic process |



Supplemental Table 11.  
Upregulated genes in cycling B cells (day 4)

| GOBPID     | Pvalue  | OddsRatio | ExpCount | Count | Size | Term                  |
|------------|---------|-----------|----------|-------|------|-----------------------|
| GO:0002376 | 0.00001 | 2.9463    | 10       | 26    | 1264 | immune system process |

**Supplemental table 12. 4C sequencing primers****Supplemental table 12a. 4C single-end sequencing primers**

| 4C viewpoint | Primer type | Primer sequence                                                        |
|--------------|-------------|------------------------------------------------------------------------|
| Upstream IgH | Primer 1    | AATGATACGGCGACCA CGAA CACTCTTTCCCTACACGACGCTCTCCGATCTCAAGGCTAATGAAGCTT |
| Upstream IgH | Primer 2    | CAAGCAGAAGACGGCATACGATCAGCGGGATGTAGAGC                                 |

**Supplemental table 12b. 4C paired-end sequencing primers**

| 4C viewpoint        | Primer type | Primer sequence                                                                  |
|---------------------|-------------|----------------------------------------------------------------------------------|
| 3'RR_4C capture     | PE 1        | AATGATACGGCGACCA CCGAGATCTACACTCTTTCCCTACACGACGCTCTCCGATCTCCGAGGCCTTACAAGCTT     |
| 3'RR_SNP            | PE 2        | CAAGCAGAAGACGGCATACGAGATCGGTCTCGGCATTCTGCTGAACCGCTCTCCGATCTCTAACTTTGGCCAGAAATC   |
| IgG3_4C capture     | PE 1        | AATGATACGGCGACCA CCGAGATCTACACTCTTTCCCTACACGACGCTCTCCGATCTAAGCCTTTCTAAGGCAGATC   |
| IgG3_SNP            | PE 2        | CAAGCAGAAGACGGCATACGAGATCGGTCTCGGCATTCTGCTGAACCGCTCTCCGATCTGGGACATTAGAGACATAGCTG |
| Distal V_4C capture | PE 1        | AATGATACGGCGACCA CCGAGATCTACACTCTTTCCCTACACGACGCTCTCCGATCTGGTGATTGCAATTCATAGATC  |
| Distal V_SNP        | PE 2        | CAAGCAGAAGACGGCATACGAGATCGGTCTCGGCATTCTGCTGAACCGCTCTCCGATCTCGGGCCTCATATCAGCTA    |

| <b>Supplemental table 13. Chromosomal locations of the SNPs (mm9)</b> |            |                 |                         |                     |
|-----------------------------------------------------------------------|------------|-----------------|-------------------------|---------------------|
| <b>4C viewpoint name</b>                                              | <b>Chr</b> | <b>Position</b> | <b>C57Bl/6 sequence</b> | <b>FVB sequence</b> |
| 3RR                                                                   | 12         | 114495014       | T                       | C                   |
| Cy3                                                                   | 12         | 114594500       | C                       | T                   |
| Distal V                                                              | 12         | 119923316       | A                       | G                   |

Supplemental figure 1.

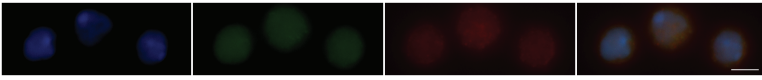

DAPI, IgH, CD45, overlay

## Supplemental figure 2.

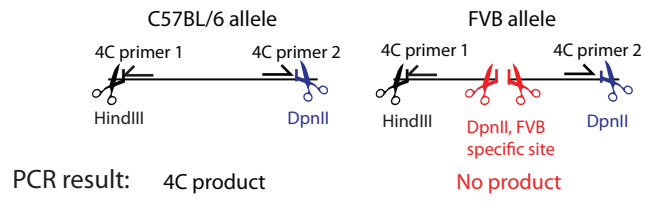

### Supplemental figure 3

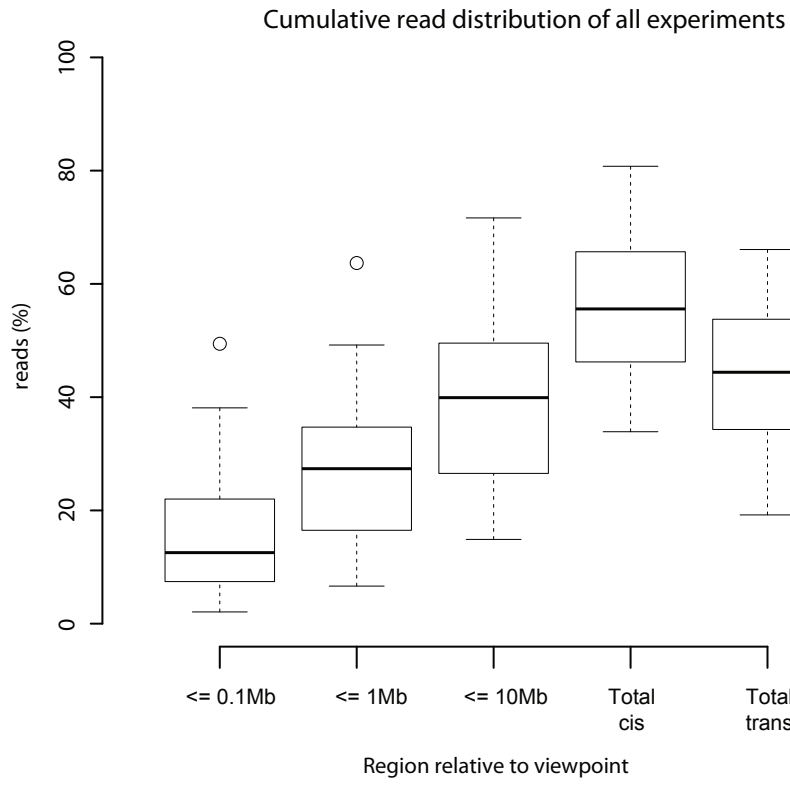

# Supplemental figure 4

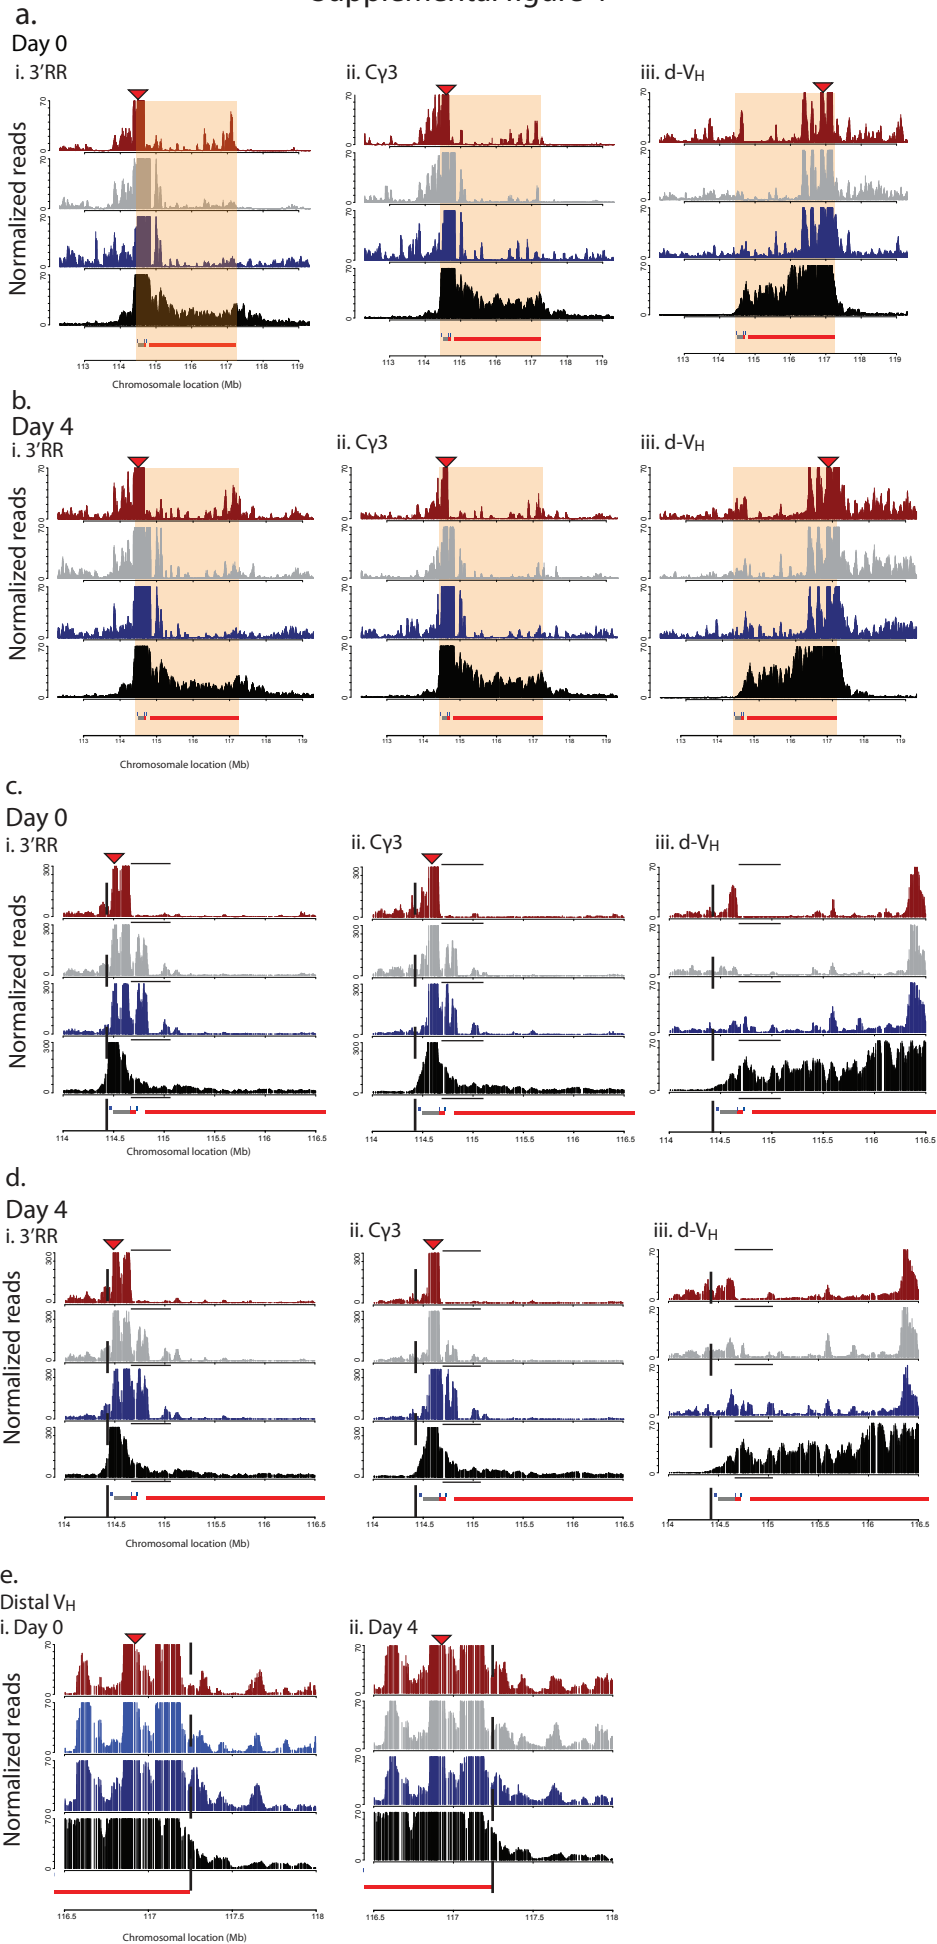

Supplemental figure 5.

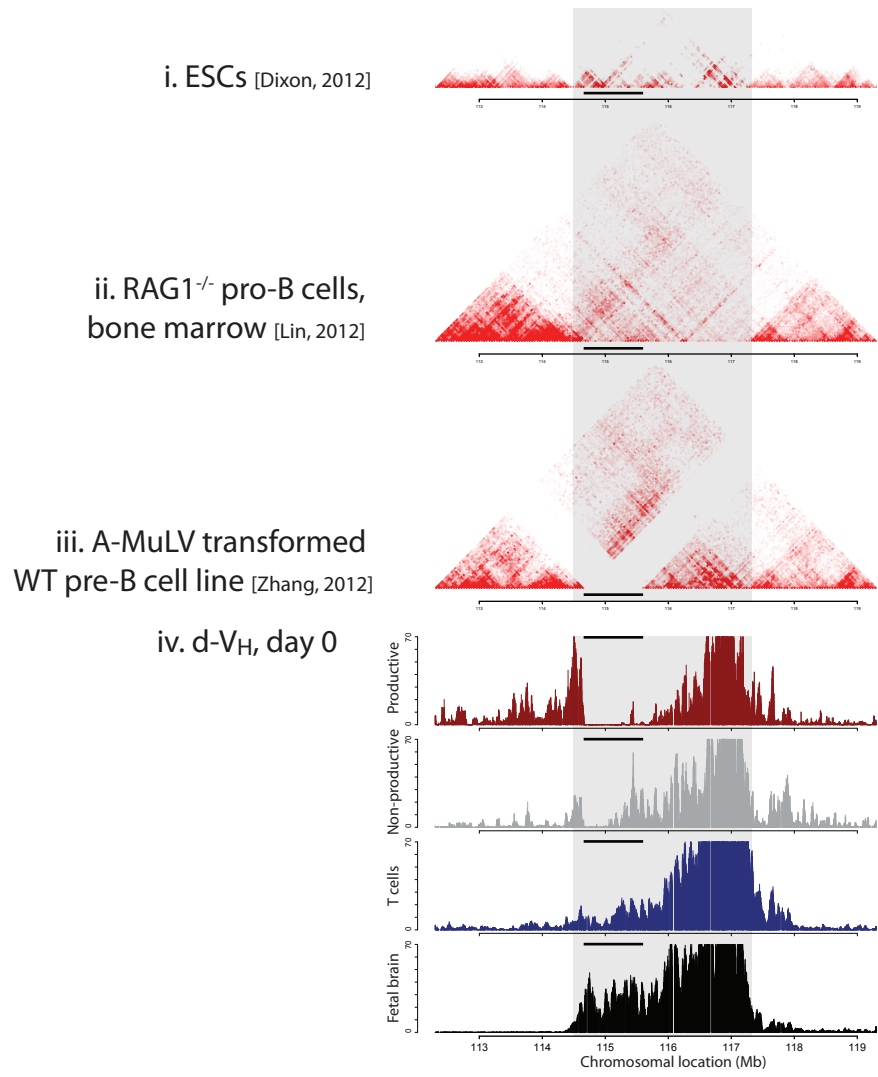



Supplemental Figure 6.

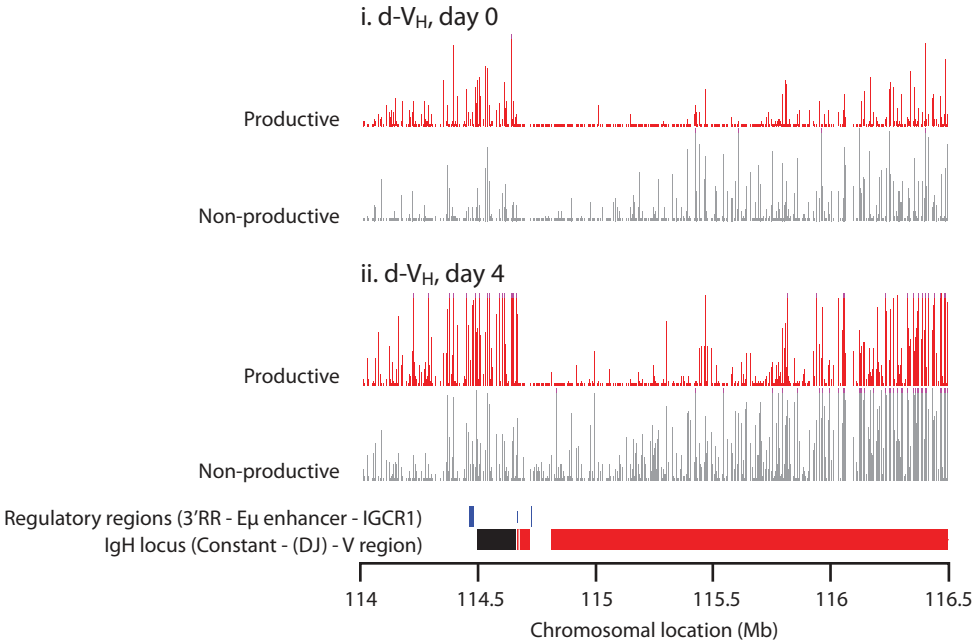

# Supplemental figure 7

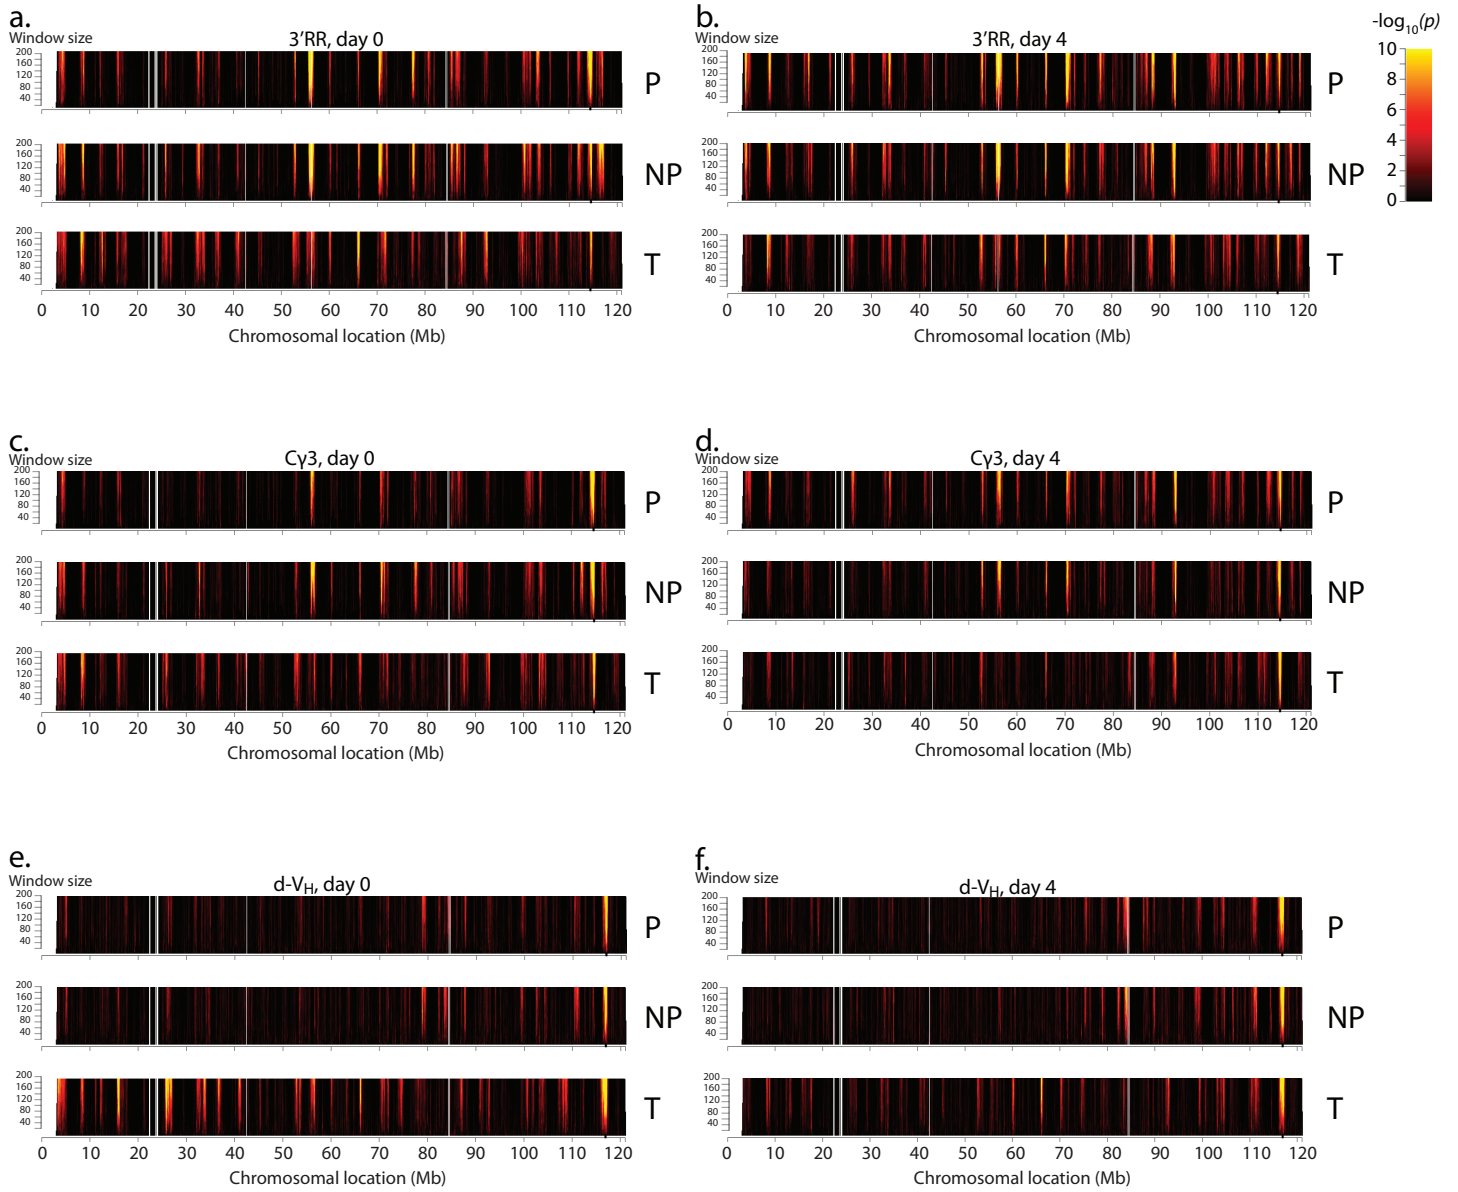

Supplemental figure 8.

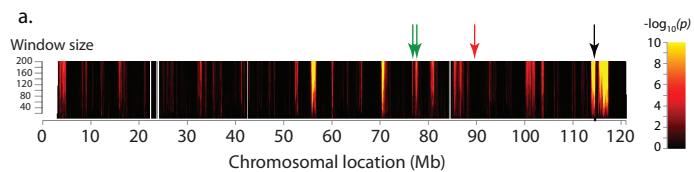

interaction A: chr12 77.5 - 77.7 Mb  
interaction B: chr12 78.9 - 79.1 Mb  
negative control: chr12 89.6 - 89.8 Mb  
IgH locus: chr12 114.5 - 114.7 Mb

b.

i. interaction A (DAPI, A, IgH)

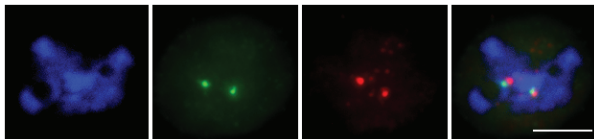

ii. negative control (DAPI, neg ctrl., IgH)

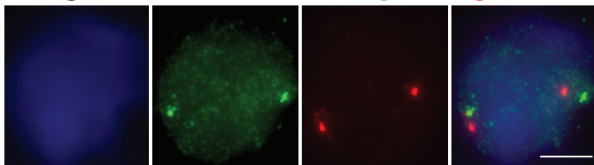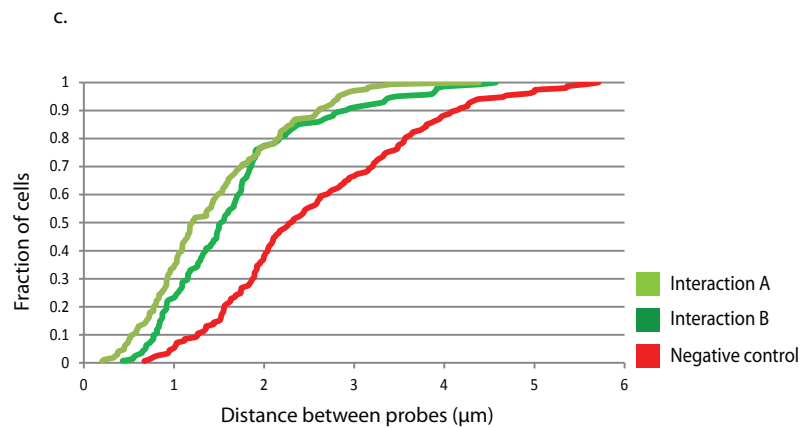

# Supplemental figure 9

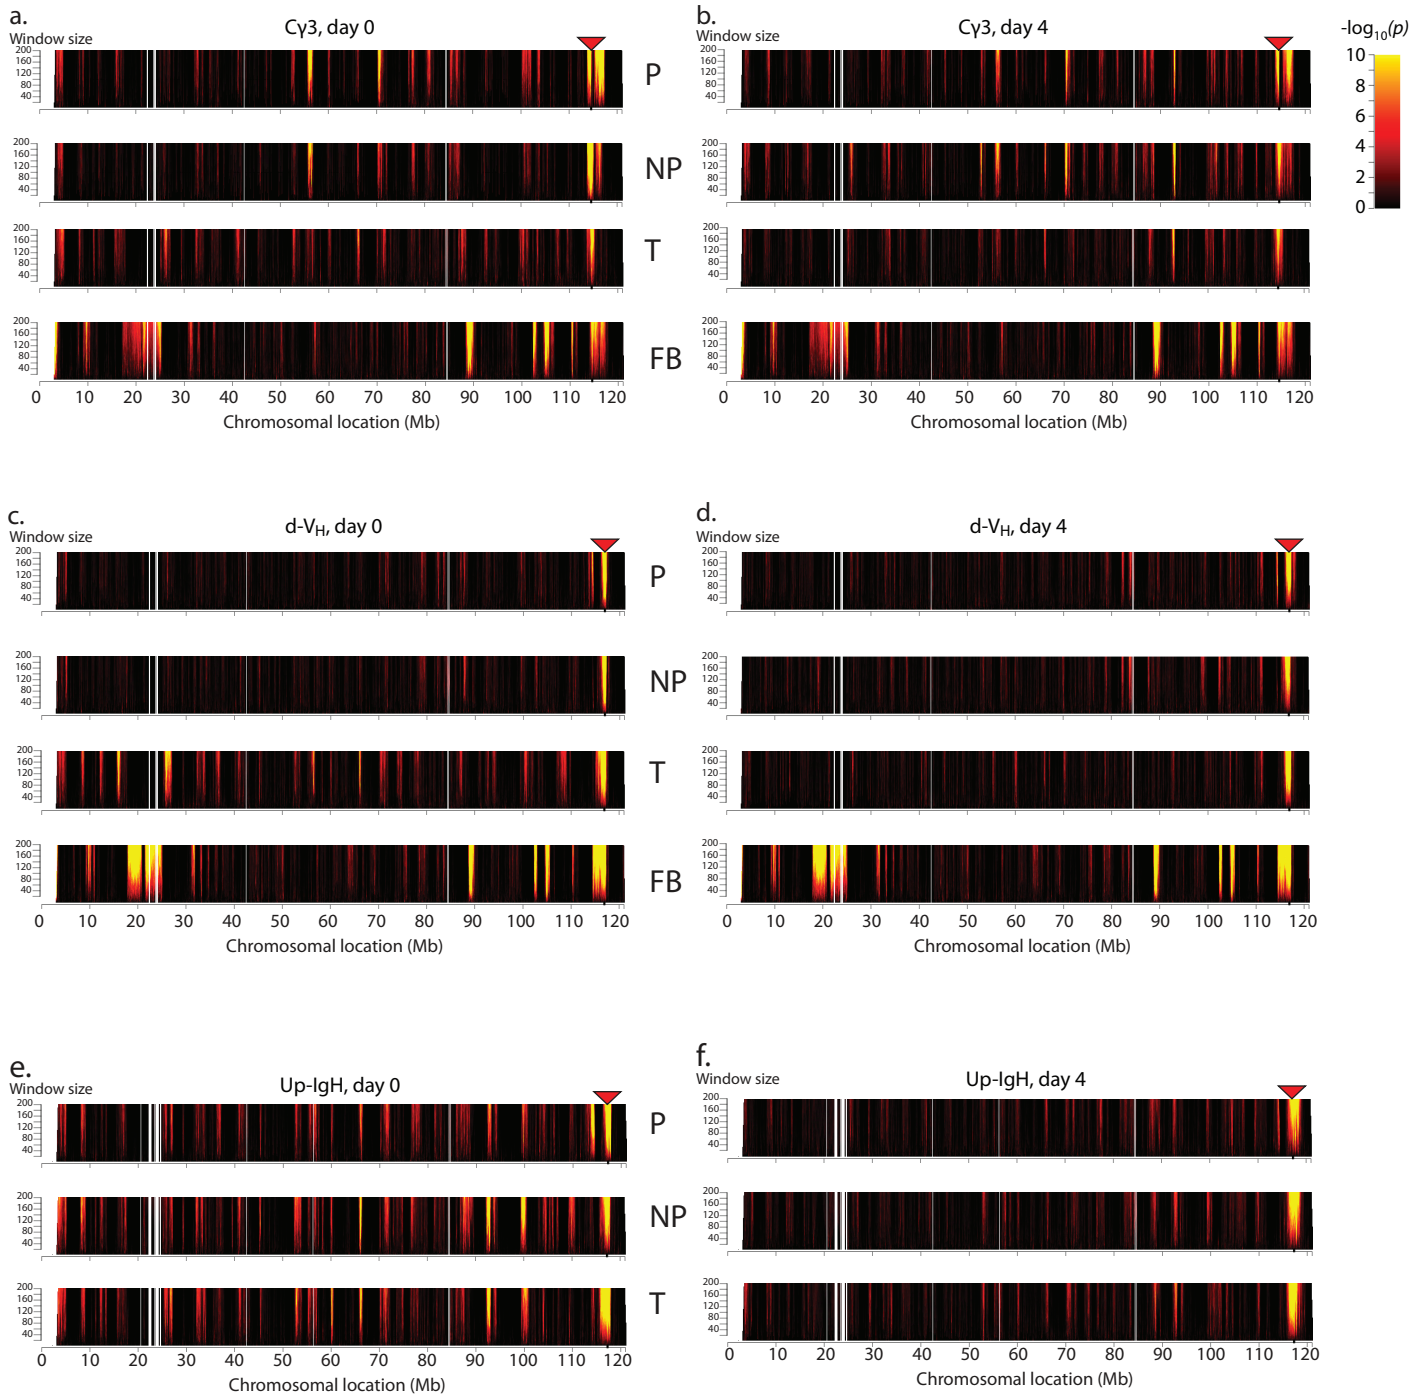

# Supplemental figure 10

a.

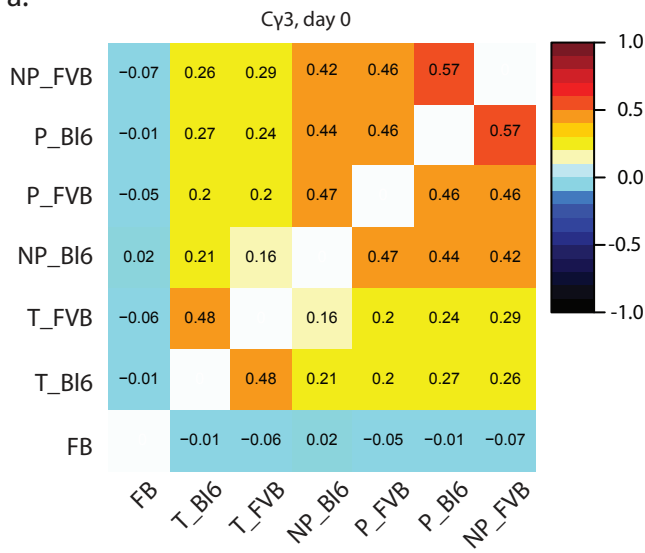

b.

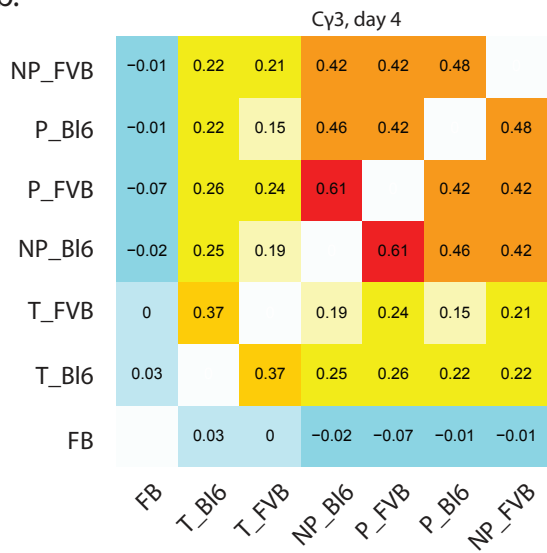

c.

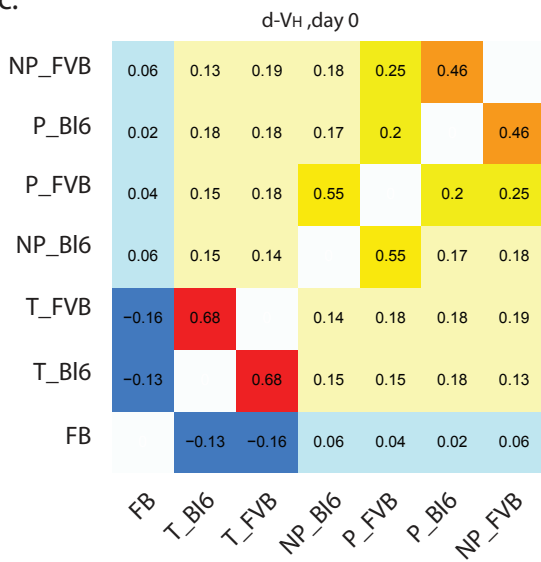

d.

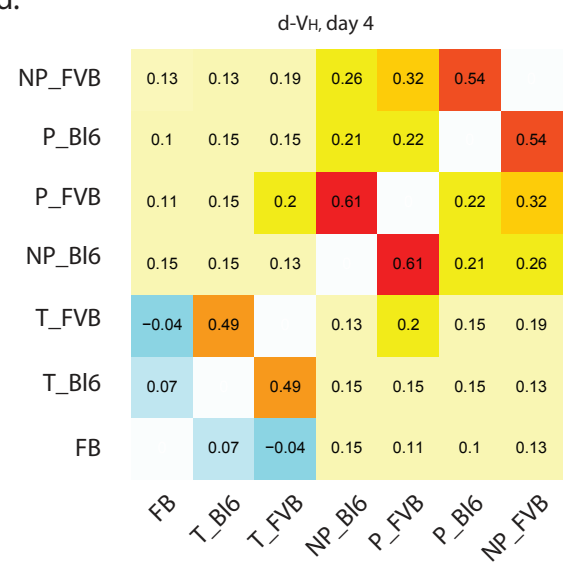

e.

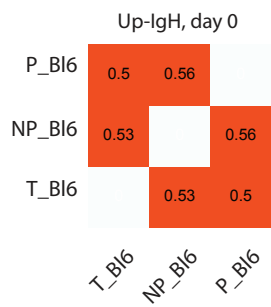

f.

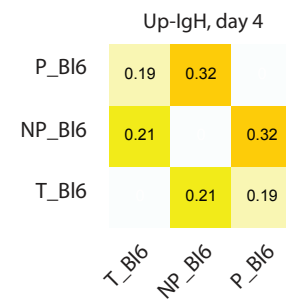

Supplemental figure 11.

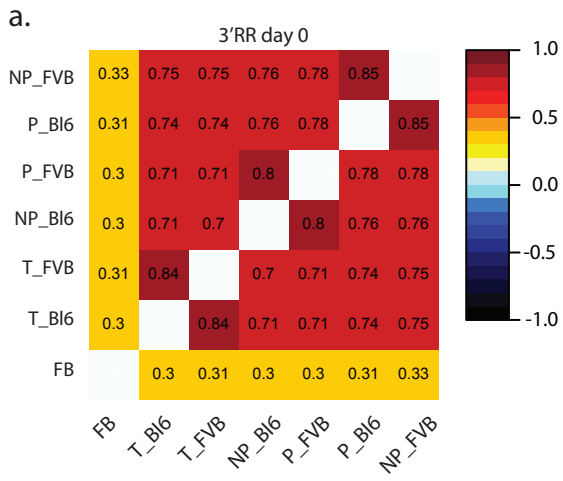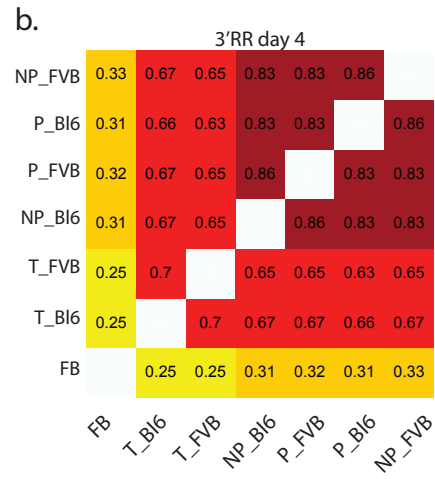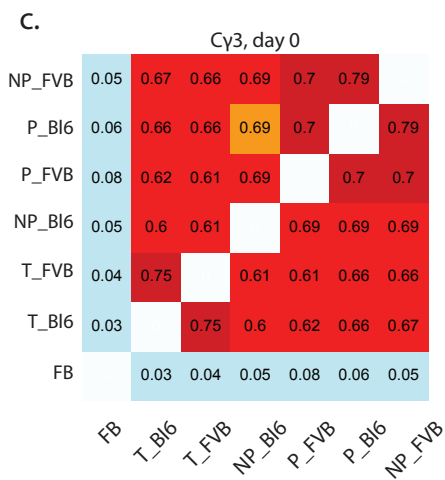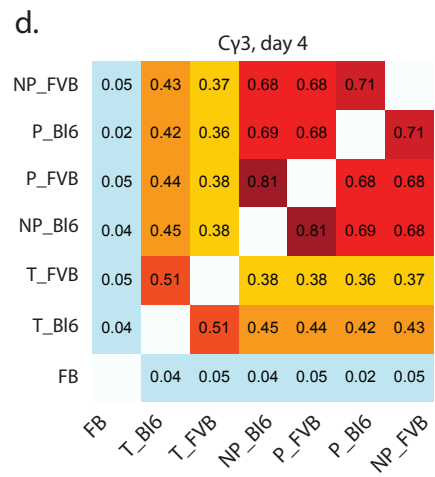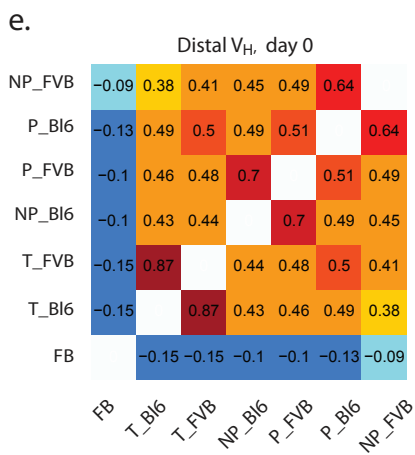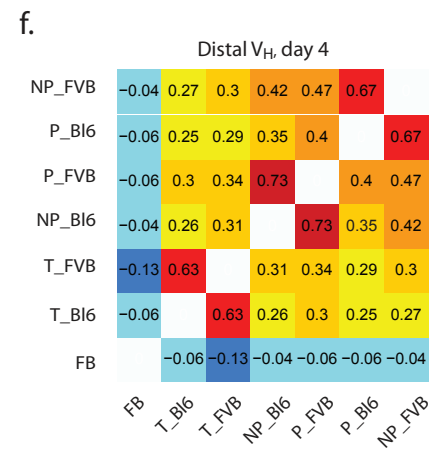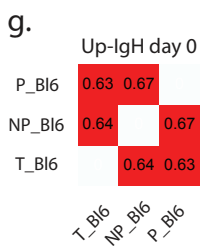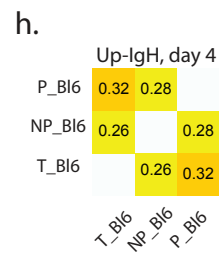

Supplemental Figure 12.

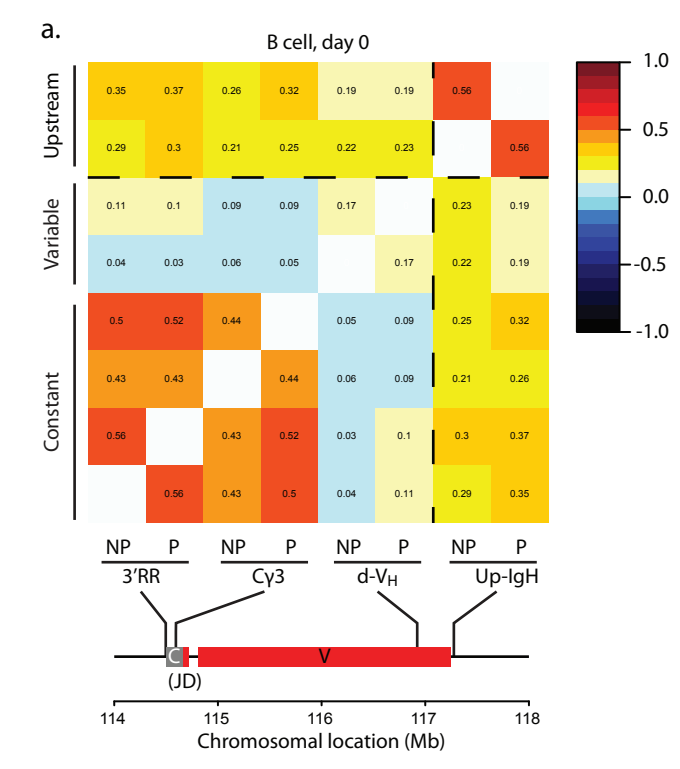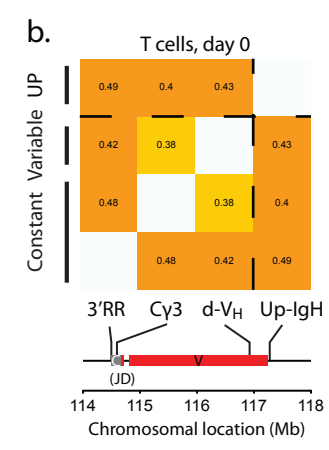

Supplemental Figure 13.

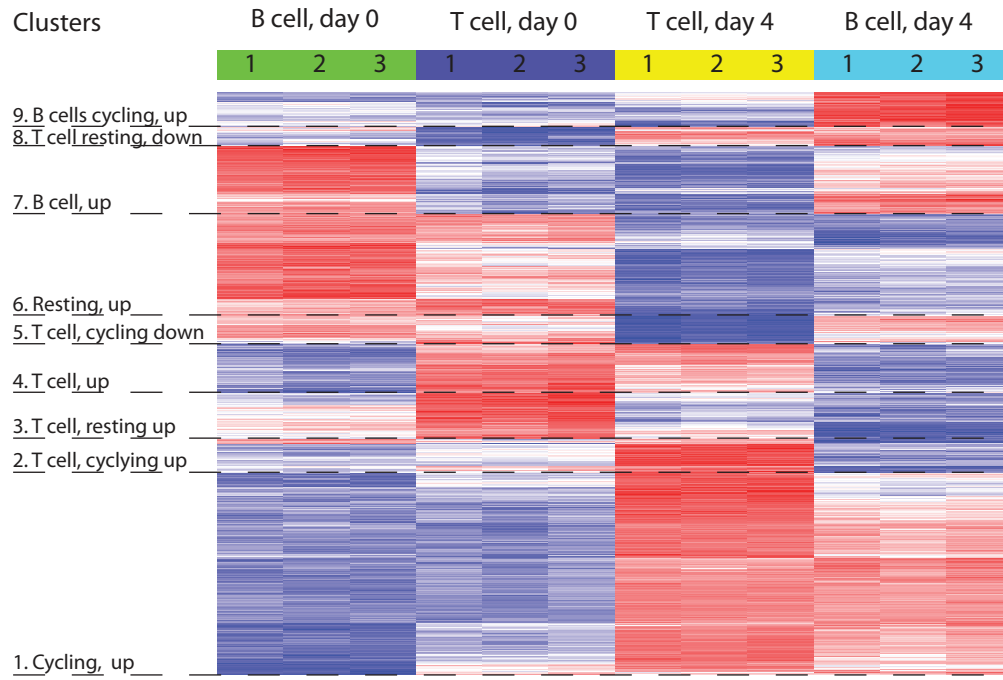

Supplement: supp_gkt491_nar-00999-m-2013-File008.pdf [file supp_gkt491_nar-00999-m-2013-File008.pdf]
